# Supplementary material
Source: publisher figshare collection journal article supplement (https://geolsoc.figshare.com/ndownloader/files/14964803)
Supplement: Supplementary file 1 [file 14964803]

## Sheet: ABU
Supplementary Table A.1 U-Pb ages of detrital zircons from every sample
Spot	U(ppm)	Th/U	U-Th-Pb ratios							Ages (Ma)						Discordance		Inferred Age (Ma)	1σ
			207Pb/206Pb	1σ	207Pb/235U	1σ	206Pb/238U	1σ	rr	207Pb/206Pb	1σ	207Pb/235U	1σ	206Pb/238U	1σ	<1000 Ma	<1000 Ma
ABU-01	193.11	0.78125	0.03804	0.02842	0.01725	0.01373	0.00329	0.00018	0.9	-407	933	17	14	21	1	19.0476	-1300	21	1
ABU-02	472.859	1.20482	0.07144	0.01261	0.02926	0.00612	0.00297	0.00011	0.9	970	354	29	6	19.1	0.7	-51.8325	-757.143	19.1	0.7
ABU-03	104.158	0.675676	0.00909	0.05476	0.00426	0.02599	0.0034	0.00029	0.9	-1386	1343	4	26	22	2	81.8182	-1200	22	2
ABU-04	67.8729	0.260417	0.05003	0.06143	0.04167	0.05516	0.00604	0.00065	0.9	196	1363	41	54	39	4	-5.12821	-1250	39	4
ABU-05	109.806	0.588235	0.03393	0.04345	0.01778	0.02394	0.0038	0.00028	0.9	-117	1094	18	24	24	2	25	-1100	24	2
ABU-06	86.9483	0.568182	0.04186	0.07794	0.02211	0.04385	0.00383	0.00052	0.9	-185	1673	22	44	25	3	12	-1366.67	25	3
ABU-07	86.4804	0.507614	0.22934	0.04346	0.11312	0.03084	0.00358	0.00035	0.9	3047	307	109	28	23	2	-373.913	-1300	23	2
ABU-08	263.416	0.526316	0.01298	0.02899	0.00613	0.01401	0.00343	0.0002	0.9	-1149	940	6	14	22	1	72.7273	-1300	22	1
ABU-09	263.613	0.884956	0.0373	0.02415	0.01459	0.01009	0.00284	0.00014	0.9	-453	799	15	10	18.3	0.9	18.0328	-1011.11	18.3	0.9
ABU-10	168.974	0.359712	0.08873	0.0418	0.03721	0.02034	0.00304	0.00026	0.9	1398	941	37	20	20	2	-85	-900	20	2
ABU-11	69.1088	0.628931	0.05333	0.0892	0.02504	0.04522	0.00341	0.00051	0.9	343	1911	25	45	22	3	-13.6364	-1400	22	3
ABU-12	159.085	0.666667	0.04593	0.04436	0.01661	0.01723	0.00262	0.00021	0.9	-6	1192	17	17	17	1	0	-1600	17	1
ABU-13	567.026	1.36986	0.04459	0.00566	0.03554	0.00543	0.00578	0.00017	0.9	-40	210	35	5	37	1	5.40541	-400	37	1
ABU-14	75.8219	0.319489	0.05253	0.05793	0.03112	0.03703	0.0043	0.00042	0.9	309	1309	31	36	28	3	-10.7143	-1100	28	3
ABU-15	93.1385	0.769231	0.12435	0.06239	0.05338	0.03206	0.00311	0.00035	0.9	2020	1117	53	31	20	2	-165	-1450	20	2
ABU-16	91.7046	0.625	0.04315	0.03994	0.03907	0.03882	0.00657	0.0005	0.9	-115	1135	39	38	42	3	7.14286	-1166.67	42	3
ABU-17	222.038	0.793651	0.04985	0.06296	0.0218	0.02942	0.00317	0.00031	0.9	188	1229	22	29	20	2	-10	-1350	20	2
ABU-18	201.347	0.719424	0.07029	0.02951	0.03088	0.01468	0.00319	0.0002	0.9	937	807	31	14	21	1	-47.619	-1300	21	1
ABU-19	84.8954	0.347222	0.00608	0.11863	0.00234	0.04605	0.00278	0.00052	0.9	-1582	2717	2	47	18	3	88.8889	-1466.67	18	3
ABU-20	105.727	0.378788	0.12659	0.04878	0.05312	0.02491	0.00304	0.00029	0.9	2051	827	53	24	20	2	-165	-1100	20	2
ABU-21	74.4348	0.350877	0.03355	0.08914	0.01296	0.03609	0.0028	0.0004	0.9	-133	2030	13	36	18	3	27.7778	-1100	18	3
ABU-22	55.8338	0.45045	0.01809	0.13886	0.0077	0.06056	0.00309	0.00065	0.9	-862	3283	8	61	20	4	60	-1425	20	4
ABU-23	176.568	0.819672	0.04293	0.01679	0.0338	0.01443	0.00571	0.00023	0.9	-127	533	34	14	37	1	8.10811	-1300	37	1
ABU-24	764.745	2.12766	0.03719	0.00372	0.02916	0.00359	0.00569	0.00015	0.9	-460	292	29	4	36.6	1	20.765	-300	36.6	1
ABU-25	166.383	0.52356	0.04136	0.02917	0.02177	0.01642	0.00382	0.00021	0.9	-212	955	22	16	25	1	12	-1500	25	1
ABU-26	106.366	0.431034	0.06778	0.04293	0.03811	0.02679	0.00408	0.00032	0.9	862	1188	38	26	26	2	-46.1538	-1200	26	2
ABU-27	1107.06	0.073046	0.03149	0.00505	0.01363	0.00253	0.00314	9e-05	0.9	-219	181	14	3	20.2	0.6	30.6931	-400	20.2	0.6
ABU-28	201.163	0.390625	0.06472	0.02513	0.03045	0.01325	0.00341	0.00018	0.9	765	750	30	13	22	1	-36.3636	-1200	22	1
ABU-29	273.354	0.763359	0.01937	0.02282	0.00843	0.01029	0.00316	0.00015	0.9	-794	903	9	10	20.3	1	55.665	-900	20.3	1
ABU-30	41.4757	0.268097	0.10877	0.13067	0.07759	0.11077	0.00517	0.00133	0.9	1779	2391	76	104	33	9	-130.303	-1055.56	33	9
ABU-31	126.727	0.420168	0.06343	0.05156	0.02609	0.02331	0.00298	0.00027	0.9	723	1342	26	23	19	2	-36.8421	-1050	19	2
ABU-32	166.245	0.469484	0.03986	0.04164	0.01754	0.0195	0.00319	0.00024	0.9	-298	1086	18	19	21	2	14.2857	-850	21	2
ABU-33	1534.81	0.109051	0.07463	0.00346	0.03194	0.00218	0.0031	8e-05	0.9	1059	86	32	2	20	0.5	-60	-300	20	0.5
ABU-34	90.9425	0.383142	0.13876	0.05521	0.07125	0.03537	0.00372	0.00042	0.9	2212	869	70	34	24	3	-191.667	-1033.33	24	3
ABU-35	223.661	0.3663	0.02772	0.02695	0.0118	0.01202	0.00309	0.00016	0.9	-386	977	12	12	20	1	40	-1100	20	1
ABU-36	473.725	0.704225	0.01292	0.00843	0.0086	0.00585	0.00483	0.00015	0.9	-1153	475	9	6	31.1	1	71.0611	-500	31.1	1
ABU-37	115.381	0.246914	0.04319	0.0276	0.02319	0.01599	0.00389	0.00022	0.9	-113	865	23	16	25	1	8	-1500	25	1
ABU-38	106.304	0.297619	0.07814	0.06444	0.02225	0.02073	0.00207	0.00025	0.9	1150	1483	22	21	13	2	-69.2308	-950	13	2
ABU-39	2182.05	0.084246	0.03965	0.00137	0.01887	0.00106	0.00345	9e-05	0.9	-310	77	19	1	22.2	0.6	14.4144	-66.6667	22.2	0.6
ABU-40	64.4455	0.414938	0.05311	0.04182	0.02832	0.02419	0.00387	0.00029	0.9	333	1191	28	24	25	2	-12	-1100	25	2
ABU-41	122.6	0.606061	0.07006	0.02903	0.03073	0.01436	0.00318	0.00019	0.9	930	793	31	14	20	1	-55	-1300	20	1
ABU-42	66.9502	0.371747	0.05277	0.04564	0.02595	0.02426	0.00357	0.00028	0.9	319	1202	26	24	23	2	-13.0435	-1100	23	2
ABU-43	60.319	0.352113	0.06664	0.04938	0.03846	0.0316	0.00419	0.00038	0.9	827	1343	38	31	27	2	-40.7407	-1450	27	2
ABU-44	100.847	0.628931	0.06491	0.02801	0.03405	0.01636	0.00381	0.00021	0.9	771	797	34	16	25	1	-36	-1500	25	1
ABU-45	98.2964	0.552486	0.04601	0.03406	0.02246	0.01787	0.00354	0.00022	0.9	-2	1057	23	18	23	1	0	-1700	23	1
ABU-46	124.789	0.454545	0.07016	0.0269	0.03053	0.01316	0.00316	0.00017	0.9	933	769	31	13	20	1	-55	-1200	20	1
ABU-47	218.615	0.763359	0.0443	0.01619	0.02061	0.00829	0.00338	0.00014	0.9	-55	506	21	8	21.8	0.9	3.66972	-788.889	21.8	0.9
ABU-48	187.201	0.371747	0.07327	0.0146	0.03906	0.00912	0.00387	0.00015	0.9	1021	396	39	9	24.9	1	-56.6265	-800	24.9	1
ABU-49	73.9589	0.44843	0.07796	0.05426	0.03244	0.02534	0.00302	0.00029	0.9	1146	1366	32	25	19	2	-68.4211	-1150	19	2
ABU-50	121.306	0.458716	0.03922	0.02904	0.01756	0.01392	0.00325	0.00019	0.9	-336	941	18	14	21	1	14.2857	-1300	21	1
ABU-51	20.9792	0.199203	0.05494	0.17386	0.0241	0.08208	0.00318	0.00086	0.9	410	3796	24	81	20	6	-20	-1250	20	6
ABU-52	107.436	0.60241	0.03712	0.03708	0.01687	0.0179	0.0033	0.00023	0.9	-464	1082	17	18	21	1	19.0476	-1700	21	1
ABU-53	208.318	0.714286	0.05745	0.01548	0.02682	0.00814	0.00339	0.00013	0.9	509	497	27	8	21.8	0.8	-23.8532	-900	21.8	0.8
ABU-54	164.54	0.657895	0.03547	0.02095	0.01645	0.01037	0.00336	0.00015	0.9	-55	772	17	10	21.6	1	21.2963	-900	21.6	1
ABU-55	49.6858	0.362319	0.05692	0.07598	0.02564	0.03716	0.00327	0.00042	0.9	488	1554	26	37	21	3	-23.8095	-1133.33	21	3
ABU-56	208.863	0.46729	0.0501	0.01722	0.02209	0.00839	0.0032	0.00013	0.9	200	534	22	8	20.6	0.8	-6.79612	-900	20.6	0.8
ABU-57	316.054	0.689655	0.00851	0.01291	0.00347	0.00537	0.00296	0.0001	0.9	-1423	732	4	5	19.1	0.6	79.0576	-733.333	19.1	0.6
ABU-58	166.893	0.512821	0.05827	0.02096	0.02555	0.01026	0.00318	0.00015	0.9	540	646	26	10	20.5	1	-26.8293	-900	20.5	1
ABU-59	183.778	0.423729	0.06325	0.01058	0.04733	0.0093	0.00543	0.00018	0.9	717	335	47	9	35	1	-34.2857	-800	35	1
ABU-60	424.204	1.0101	0.05291	0.00892	0.02176	0.00425	0.00298	9e-05	0.9	325	335	22	4	19.2	0.6	-14.5833	-566.667	19.2	0.6
ABU-61	118.172	0.8	0.11227	0.02912	0.05312	0.01688	0.00343	0.00022	0.92	1836	500	53	16	22	1	-140.909	-1500	22	1
ABU-62	49.5264	0.60241	0.09551	0.06459	0.05084	0.03962	0.00386	0.00045	0.9	1538	1441	50	38	25	3	-100	-1166.67	25	3
ABU-63	174.935	0.561798	0.0432	0.02002	0.01941	0.00979	0.00326	0.00015	0.9	-112	626	20	10	21	1	4.7619	-900	21	1
ABU-64	111.709	0.471698	0.04495	0.03843	0.02183	0.02021	0.00352	0.00028	0.9	-22	1131	22	20	23	2	4.34783	-900	23	2
ABU-65	102.428	0.595238	0.05376	0.03605	0.02291	0.01675	0.00309	0.00021	0.9	361	1093	23	17	20	1	-15	-1600	20	1
ABU-66	112.083	0.574713	0.05307	0.01898	0.04314	0.01718	0.0059	0.00027	0.9	332	587	43	17	38	2	-13.1579	-750	38	2
ABU-67	153.166	0.740741	0.05369	0.02194	0.0251	0.01131	0.00339	0.00016	0.9	358	692	25	11	22	1	-13.6364	-1000	22	1
ABU-68	64.1239	0.497512	0.0749	0.05251	0.03473	0.02719	0.00336	0.00031	0.9	1066	1354	35	27	22	2	-59.0909	-1250	22	2
ABU-69	180.431	0.75188	0.05246	0.01748	0.02518	0.00929	0.00348	0.00014	0.9	306	542	25	9	22.4	0.9	-11.6071	-900	22.4	0.9
ABU-70	79.1974	0.408163	0.16828	0.04666	0.0777	0.02856	0.00335	0.00035	0.9	2541	529	76	27	22	2	-245.455	-1250	22	2
ABU-71	92.0391	0.358423	0.0278	0.03667	0.01629	0.02248	0.00425	0.00029	0.9	-382	1011	16	22	27	2	40.7407	-1000	27	2
ABU-72	1202.39	0.60241	0.0652	0.00351	0.03112	0.00244	0.00346	0.0001	0.9	781	105	31	2	22.3	0.6	-39.0135	-233.333	22.3	0.6
ABU-73	87.3919	0.763359	0.09691	0.04446	0.03846	0.02059	0.00288	0.00025	0.9	1565	943	38	20	19	2	-100	-900	19	2
ABU-74	150.896	0.806452	0.03551	0.021	0.01856	0.01172	0.00379	0.00017	0.9	-53	774	19	12	24	1	20.8333	-1100	24	1
ABU-75	89.2052	0.704225	0.0576	0.04447	0.02842	0.02413	0.00358	0.00031	0.9	515	1233	28	24	23	2	-21.7391	-1100	23	2
ABU-76	153.306	0.729927	0.03578	0.03668	0.01433	0.01557	0.00291	0.0002	0.9	-42	1113	14	16	19	1	26.3158	-1500	19	1
ABU-77	206.084	0.44843	0.01791	0.01307	0.01225	0.00936	0.00496	0.00019	0.9	-871	617	12	9	32	1	62.5	-800	32	1
ABU-78	224.136	0.740741	0.06178	0.01548	0.02659	0.00757	0.00312	0.00012	0.9	667	505	27	7	20.1	0.8	-34.3284	-775	20.1	0.8
ABU-79	265.624	0.854701	0.0384	0.01823	0.01558	0.00801	0.00294	0.00013	0.9	-385	602	16	8	18.9	0.8	15.3439	-900	18.9	0.8
ABU-80	136.358	0.396825	0.05594	0.02242	0.02911	0.0129	0.00377	0.00018	0.9	450	698	29	13	24	1	-20.8333	-1200	24	1
ABU-81	92.755	0.505051	0.05675	0.03442	0.02915	0.01935	0.00373	0.00024	0.9	482	1000	29	19	24	2	-20.8333	-850	24	2
ABU-82	485.209	0.819672	0.05146	0.00372	0.04136	0.00391	0.00583	0.00015	0.9	261	152	41	4	37.5	1	-9.33333	-300	37.5	1
ABU-83	242.097	0.833333	0.05995	0.01428	0.02663	0.00722	0.00322	0.00012	0.9	602	477	27	7	20.7	0.8	-30.4348	-775	20.7	0.8
ABU-84	160.065	0.649351	0.08913	0.02278	0.03669	0.011	0.00299	0.00015	0.9	1407	514	37	11	19.2	1	-92.7083	-1000	19.2	1
ABU-85	41.4057	0.446429	0.04545	0.14416	0.01421	0.04798	0.00227	0.00052	0.9	-31	2972	14	48	15	3	6.66667	-1500	15	3
ABU-86	79.6315	0.555556	0.14013	0.02708	0.09107	0.02231	0.00471	0.00028	0.9	2229	343	88	21	30	2	-193.333	-950	30	2
ABU-87	377.916	0.806452	0.04387	0.00559	0.03203	0.00488	0.0053	0.00015	0.9	-77	194	32	5	34.1	1	6.15836	-400	34.1	1
ABU-88	219.929	0.917431	0.04294	0.01799	0.0178	0.00809	0.00301	0.00012	0.9	-126	582	18	8	19.4	0.8	7.21649	-900	19.4	0.8
ABU-89	31.5249	0.215983	0.04652	0.09467	0.03662	0.07973	0.00571	0.00091	0.9	25	2097	37	78	37	6	0	-1200	37	6
ABU-90	142.378	0.199203	0.09623	0.02505	0.06457	0.02048	0.00487	0.00031	0.91	1552	516	64	20	31	2	-106.452	-900	31	2
ABU-91	34.1775	0.282486	0.05971	0.15414	0.02163	0.0606	0.00263	0.00065	0.9	593	3175	22	60	17	4	-29.4118	-1400	17	4
ABU-92	430.817	0.657895	0.05567	0.00845	0.02351	0.00418	0.00306	9e-05	0.9	439	305	24	4	19.7	0.6	-21.8274	-566.667	19.7	0.6
ABU-93	75.7725	0.364964	0.10836	0.04323	0.05912	0.02792	0.00396	0.00033	0.9	1772	863	58	27	25	2	-132	-1250	25	2
ABU-94	378.061	0.917431	0.04864	0.00615	0.03225	0.0049	0.00481	0.00014	0.9	131	243	32	5	30.9	0.9	-3.55987	-455.556	30.9	0.9
ABU-95	85.8498	0.769231	0.07162	0.04867	0.0358	0.0273	0.00363	0.00034	0.9	975	1290	36	27	23	2	-56.5217	-1250	23	2
ABU-96	58.6086	0.595238	0.3299	0.06728	0.12961	0.04659	0.00285	0.00055	0.9	3617	319	124	42	18	4	-588.889	-950	18	4
ABU-97	1029.5	0.295858	0.04607	0.005	0.02076	0.00257	0.00327	8e-05	0.66	2	221	21	3	21	0.5	0	-500	21	0.5
ABU-98	132.091	0.746269	0.03625	0.02652	0.01696	0.01321	0.00339	0.00018	0.9	-24	1015	17	13	22	1	22.7273	-1200	22	1
ABU-99	112.461	0.588235	0.05828	0.03181	0.03053	0.01838	0.0038	0.00024	0.9	540	1027	31	18	24	2	-29.1667	-800	24	2
ABU-100	70.187	0.581395	0.05875	0.05368	0.03002	0.03002	0.00371	0.00036	0.9	558	1380	30	30	24	2	-25	-1400	24	2
ABU-101	102.702	0.584795	0.04758	0.04031	0.02091	0.01906	0.00319	0.00023	0.9	78	1211	21	19	21	1	0	-1800	21	1
ABU-102	85.4771	0.342466	0.08299	0.0558	0.04007	0.03089	0.0035	0.00039	0.9	1269	1373	40	30	23	3	-73.913	-900	23	3
ABU-103	107.88	0.568182	0.04406	0.05551	0.01903	0.02582	0.00313	0.00034	0.9	-67	1444	19	26	20	2	5	-1200	20	2
ABU-104	191.635	0.625	0.01868	0.02142	0.0077	0.00913	0.00299	0.00013	0.9	-830	921	8	9	19.2	0.8	58.3333	-1025	19.2	0.8
ABU-105	213.169	0.75188	0.12102	0.02044	0.05832	0.01281	0.00349	0.00019	0.93	1971	355	58	12	22	1	-163.636	-1100	22	1
ABU-106	232.272	0.694444	0.05247	0.01559	0.02362	0.00785	0.00327	0.00013	0.9	306	572	24	8	21	0.8	-14.2857	-900	21	0.8
ABU-107	415.142	0.649351	0.05089	0.01035	0.02105	0.0049	0.003	0.0001	0.9	236	404	21	5	19.3	0.6	-8.80829	-733.333	19.3	0.6
ABU-108	740.747	0.0944287	0.06969	0.00653	0.03112	0.00375	0.00324	0.0001	0.9	919	212	31	4	20.9	0.6	-48.3254	-566.667	20.9	0.6
ABU-109	379.122	0.675676	0.073	0.00888	0.04892	0.00753	0.00486	0.00018	0.9	1014	275	48	7	31	1	-54.8387	-600	31	1
ABU-110	281.731	0.529101	0.06224	0.01213	0.02925	0.00661	0.00341	0.00012	0.9	682	438	29	7	21.9	0.8	-32.4201	-775	21.9	0.8
ABU-111	102.384	0.515464	0.03389	0.03959	0.01844	0.02275	0.00395	0.00029	0.9	-119	1181	19	23	25	2	24	-1050	25	2
ABU-112	88.552	0.404858	0.01869	0.04367	0.00851	0.02044	0.0033	0.00024	0.9	-830	1237	9	21	21	2	57.1429	-950	21	2
ABU-113	91.2159	0.625	0.05681	0.02738	0.04597	0.02452	0.00587	0.00034	0.9	484	899	46	24	38	2	-21.0526	-1100	38	2
ABU-114	312.612	0.840336	0.01655	0.01204	0.00729	0.00553	0.0032	0.00011	0.9	-946	655	7	6	20.6	0.7	66.0194	-757.143	20.6	0.7
ABU-115	100.467	0.411523	0.10109	0.02918	0.05064	0.01732	0.00363	0.00022	0.9	1644	685	50	17	23	1	-117.391	-1600	23	1
ABU-116	107.082	0.456621	0.03679	0.03414	0.01662	0.01633	0.00328	0.0002	0.9	-2	1153	17	16	21	1	19.0476	-1500	21	1
ABU-117	98.5148	0.3861	0.05464	0.03704	0.02475	0.01825	0.00329	0.00022	0.9	398	1140	25	18	21	1	-19.0476	-1700	21	1
ABU-118	250.631	0.431034	0.06072	0.01446	0.02666	0.00724	0.00318	0.00012	0.9	629	518	27	7	20.5	0.8	-31.7073	-775	20.5	0.8
ABU-119	224.691	0.438596	0.08006	0.01932	0.04201	0.01217	0.00381	0.00021	0.9	1198	555	42	12	25	1	-68	-1100	25	1
ABU-120	148.04	0.625	0.03209	0.02712	0.01414	0.01262	0.0032	0.00017	0.9	-194	1021	14	13	21	1	33.3333	-1200	21	1
ABU-121	69.0837	0.438596	0.09523	0.14042	0.01814	0.0307	0.00138	0.00034	0.9	1533	2963	18	31	9	2	-100	-1450	9	2
ABU-122	95.6128	0.396825	0.1311	0.03183	0.06181	0.01864	0.00342	0.00023	0.9	2113	533	61	18	22	1	-177.273	-1700	22	1
ABU-123	84.2866	0.5	0.05239	0.04848	0.02216	0.02218	0.00307	0.00026	0.9	302	1318	22	22	20	2	-10	-1000	20	2

## Sheet: CH-01
Supplementary Table A.1 U-Pb ages of detrital zircons from every sample
Spot	U(ppm)	Th/U	U-Th-Pb ratios							Ages (Ma)						Discordance		Inferred Age (Ma)	1σ
			207Pb/206Pb	1σ	207Pb/235U	1σ	206Pb/238U	1σ	rr	207Pb/206Pb	1σ	207Pb/235U	1σ	206Pb/238U	1σ	<1000 Ma	>1000 Ma
CH01-02	289.392	0.355872	0.04359	0.01349	0.02655	0.00907	0.00442	0.00016	0.9	-92	457	27	9	28	1	3.57143	428.571	28	1
CH01-07	149.093	0.352113	0.02459	0.06378	0.00689	0.01851	0.00203	0.00021	0.9	-532	1498	7	19	13	1	46.1538	4192.31	13	1
CH01-13	47.5164	0.404858	0.06325	0.06744	0.04274	0.04992	0.0049	0.00056	0.9	717	1516	42	49	32	4	-31.25	-2140.62	32	4
CH01-17	67.2671	0.581395	0.08481	0.04641	0.05777	0.03596	0.00494	0.00042	0.9	1311	1059	57	35	32	3	-78.125	-3996.88	32	3
CH01-18	123.89	0.471698	0.0308	0.02832	0.0197	0.01906	0.00464	0.00025	0.9	-249	992	20	19	30	2	33.3333	930	30	2
CH01-19	55.9135	0.469484	0.04817	0.04792	0.04273	0.04577	0.00643	0.00055	0.9	108	1275	42	45	41	4	-2.43902	-163.415	41	4
CH01-23	379.945	0.806452	0.0411	0.00794	0.02901	0.00636	0.00512	0.00015	0.9	-227	287	29	6	32.9	1	11.8541	789.97	32.9	1
CH01-24	136.385	0.409836	0.05384	0.08327	0.01196	0.02002	0.00161	0.00023	0.9	364	1710	12	20	10	1	-20	-3540	10	1
CH01-25	235.92	0.877193	0.0617	0.04212	0.01335	0.01002	0.00157	0.00012	0.9	664	1155	13	10	10.1	0.8	-28.7129	-6474.26	10.1	0.8
CH01-26	51.5883	0.3003	0.02852	0.06269	0.02295	0.05256	0.00583	0.0006	0.9	-350	1424	23	52	37	4	37.8378	1045.95	37	4
CH01-27	70.6888	0.505051	0.05263	0.09209	0.02453	0.04635	0.00338	0.00053	0.9	313	1863	25	46	22	3	-13.6364	-1322.73	22	3
CH01-38	267.457	0.666667	-0.09703	-0.06284	-0.01545	0.00878	0.00115	0.0001	0.9	-2764	2901	-16	9	7.4	0.6	316.216	37451.4	7.4	0.6
CH01-39	449.531	0.591716	0.03709	0.02567	0.00708	0.00522	0.00138	7e-05	0.9	-466	905	7	5	8.9	0.5	21.3483	5335.96	8.9	0.5
CH01-40	76.5071	0.471698	0.08137	0.0431	0.06138	0.03708	0.00547	0.00046	0.9	1230	1045	60	35	35	3	-71.4286	-3414.29	35	3
CH01-43	276.088	0.649351	0.05362	0.04757	0.0096	0.00924	0.0013	0.00011	0.9	355	1296	10	9	8.4	0.7	-19.0476	-4126.19	8.4	0.7
CH01-48	186.26	0.568182	0.03851	0.06772	0.00701	0.01304	0.00132	0.00015	0.9	-378	1545	7	13	8.5	1	17.6471	4547.06	8.5	1
CH01-49	161.261	0.606061	0.08243	0.01629	0.06097	0.01425	0.00536	0.00022	0.9	1256	394	60	14	34	1	-76.4706	-3594.12	34	1
CH01-56	52.2709	0.423729	0.08713	0.1029	0.03403	0.04541	0.00283	0.00049	0.9	1363	1970	34	45	18	3	-88.8889	-7472.22	18	3
CH01-57	194.105	0.578035	0.05079	0.27526	0.00293	0.017	0.00042	0.00018	0.9	231	4340	3	17	3	1	0	-7600	3	1
CH01-58	235.537	0.473934	0.00608	0.08437	0.00109	0.01526	0.00131	0.00018	0.9	-1582	2233	1	15	8	1	87.5	19875	8	1
CH01-70	73.5704	0.598802	0.04726	0.05818	0.03212	0.04239	0.00493	0.00049	0.9	62	1381	32	42	32	3	0	-93.75	32	3
CH01-73	111	0.401606	0.09539	0.04145	0.07272	0.03705	0.00553	0.00047	0.9	1536	938	71	35	36	3	-97.2222	-4166.67	36	3
CH01-78	241	0.571429	0.0138	0.05719	0.00253	0.01069	0.00133	0.00012	0.9	-1101	1479	3	11	8.6	0.8	65.1163	12902.3	8.6	0.8
CH01-82	70	0.423729	0.04569	0.07688	0.03524	0.06346	0.00559	0.00074	0.9	-18	1622	35	62	36	5	2.77778	150	36	5
CH01-85	60	0.47619	0.07352	0.05931	0.04633	0.04152	0.00457	0.00046	0.9	1028	1395	46	40	29	3	-58.6207	-3444.83	29	3
CH01-88	2339	1.88679	0.03072	0.0018	0.01491	0.0012	0.00352	9e-05	0.9	-253	75	15	1	22.7	0.6	33.9207	1214.54	22.7	0.6
CH01-89	82	0.398406	0.04917	0.03312	0.04043	0.02947	0.00596	0.00037	0.9	156	999	40	29	38	2	-5.26316	-310.526	38	2
CH01-91	54	0.413223	0.12559	0.05812	0.0862	0.04795	0.00498	0.00053	0.9	2037	992	84	45	32	3	-162.5	-6265.62	32	3
CH01-97	219	0.617284	0.0803	0.05815	0.01426	0.0116	0.00129	0.00013	0.9	1204	1312	14	12	8.3	0.8	-68.6747	-14406	8.3	0.8
CH01-99	92	0.3663	0.03854	0.08243	0.01338	0.03028	0.00252	0.00035	0.9	-376	1807	13	30	16	2	18.75	2450	16	2
CH01-100	64	0.44843	0.14046	0.05849	0.10566	0.05481	0.00546	0.00064	0.9	2233	914	102	50	35	4	-191.429	-6280	35	4
CH01-102	51	0.440529	0.07379	0.07219	0.05022	0.05446	0.00494	0.00059	0.9	1036	1557	50	53	32	4	-56.25	-3137.5	32	4
CH01-113	68	0.526316	0.13993	0.051	0.10577	0.04733	0.00548	0.00052	0.9	2226	734	102	43	35	3	-191.429	-6260	35	3
CH01-115	53	0.512821	0.09257	0.05204	0.08399	0.05388	0.00658	0.00059	0.9	1479	1074	82	50	42	4	-95.2381	-3421.43	42	4
Ages assumed < 0.5 Ma
CH01-01	55.2325	0.506639
CH01-03	89.8796	0.404448
CH01-04	65.4536	0.641308
CH01-05	35.7539	0.452817
CH01-06	33.7048	0.39336
CH01-08	89.9573	0.661
CH01-09	112.357	0.562453
CH01-10	89.7424	0.313887
CH01-11	114.408	0.691618
CH01-12	81.1663	0.517516
CH01-14	63.0084	0.581217
CH01-15	45.5735	0.587672
CH01-16	40.5524	0.264731
CH01-20	33.7478	0.368372
CH01-21	38.7223	0.469981
CH01-22	180.43	1.02575
CH01-28	53.5704	0.433129
CH01-29	40.9012	0.515116
CH01-30	74.6086	0.35391
CH01-31	74.3831	0.230117
CH01-32	51.4134	0.598025
CH01-33	47.8311	0.371267
CH01-34	42.262	0.243765
CH01-35	61.4453	0.651894
CH01-36	60.2119	0.518587
CH01-37	106.168	0.513431
CH01-41	86.3322	0.593362
CH01-42	67.7873	0.365006
CH01-44	47.9973	0.438254
CH01-45	49.2515	0.429101
CH01-46	86.3915	0.33958
CH01-47	75.4324	0.367574
CH01-50	112.075	0.689686
CH01-51	74.5884	0.455037
CH01-52	57.5618	0.305615
CH01-53	118.85	0.467364
CH01-54	49.558	0.483613
CH01-55	73.4582	0.372264
CH01-59	71.6011	0.306596
CH01-60	76.0776	0.543478
CH01-61	86.938	0.49285
CH01-62	44.0676	0.297448
CH01-63	45.5706	0.595915
CH01-64	103.052	0.573795
CH01-65	86.9972	0.365436
CH01-66	68.2062	0.297731
CH01-67	69.8819	0.798052
CH01-68	32.1421	0.383403
CH01-69	105.78	0.543171
CH01-71	89.0988	0.475066
CH01-72	66.5437	0.498344
CH01-74	149.954	0.493549
CH01-75	64.5434	0.583108
CH01-76	110.987	0.514979
CH01-77	41.9565	0.309283
CH01-79	34.1114	0.435229
CH01-80	110.358	0.573677
CH01-81	48.5856	0.440838
CH01-83	63.5016	0.490077
CH01-84	190.635	0.549699
CH01-86	45.8809	0.37927
CH01-87	55.9078	0.319157
CH01-90	225.039	0.636947
CH01-92	169.496	0.722029
CH01-93	96.9595	0.517842
CH01-94	419.804	0.26708
CH01-95	111.484	0.57865
CH01-96	29.9134	0.39144
CH01-98	47.0691	0.580965
CH01-101	29.2888	0.236897
CH01-103	62.848	0.584333
CH01-104	54.746	0.39552
CH01-105	93.0618	0.479069
CH01-106	75.8396	0.728922
CH01-107	150.419	0.54073
CH01-108	92.6306	0.442625
CH01-109	99.5542	0.553265
CH01-110	55.7593	0.557981
CH01-111	57.4414	0.396478
CH01-112	73.0244	0.402003
CH01-114	57.4231	0.413266
CH01-116	98.608	0.372115
CH01-117	51.2755	0.33157
CH01-118	76.8744	0.612066
CH01-119	77.6408	0.396056
CH01-120	34.6489	0.251913

## Sheet: AB-01b
Supplementary Table A.1 U-Pb ages of detrital zircons from every sample
Spot	U(ppm)	Th/U	U-Th-Pb ratios							Ages (Ma)						Discordance		Inferred Age (Ma)	1σ
			207Pb/206Pb	1σ	207Pb/235U	1σ	206Pb/238U	1σ	pr	207Pb/206Pb	1σ	207Pb/235U	1σ	206Pb/238U	1σ	<1000 Ma	>1000 Ma
AB1B-01	51.3843	0.462963	0.04153	0.06766	0.01273	0.02207	0.00222	0.00026	0.9	-203	1564	13	22	14	2	7.14286	1550	14	2
AB1B-02	70.9386	0.409836	-0.06309	-0.06282	-0.01809	0.01643	0.00208	0.0002	0.9	-1455	1784	-19	17	13	1	246.154	11292.3	13	1
AB1B-03	69.0401	0.641026	0.04237	0.14967	0.00442	0.0166	0.00076	0.00019	0.9	-157	3024	4	17	5	1	20	3240	5	1
AB1B-05	71.9397	0.636943	0.04331	0.06866	0.00969	0.01643	0.00162	0.0002	0.9	-107	1576	10	17	10	1	0	1170	10	1
AB1B-04	91.9599	0.507614	0.04779	0.04748	0.01205	0.01297	0.00183	0.00017	0.9	89	1277	12	13	12	1	0	-641.667	12	1
AB1B-06	67.685	0.27933	0.05319	0.10526	0.01124	0.02427	0.00153	0.00031	0.9	337	2510	11	24	10	2	-10	-3270	10	2
AB1B-07	108.989	0.4329	0.12117	0.03096	0.03605	0.01154	0.00216	0.00016	0.9	1974	583	36	11	14	1	-157.143	-14000	14	1
AB1B-08	150.572	0.377358	0.05102	0.03316	0.01526	0.01098	0.00217	0.00017	0.9	242	965	15	11	14	1	-7.14286	-1628.57	14	1
AB1B-09	140.905	0.684932	0.04856	0.01646	0.02212	0.00839	0.0033	0.00015	0.9	127	561	22	8	21.2	1	-3.77358	-499.057	21.2	1
AB1B-10	172.202	0.571429	0.00533	0.04973	0.00073	0.00687	0.001	9e-05	0.9	-1633	1389	1	7	6.4	0.6	84.375	25615.6	6.4	0.6
AB1B-11	430.611	0.746269	0.04568	0.00313	0.03296	0.00302	0.00523	0.00014	0.9	-19	134	33	3	33.6	0.9	1.78571	156.548	33.6	0.9
AB1B-12	46.8854	0.436681	0.12129	0.08839	0.03551	0.0316	0.00212	0.00039	0.9	1975	1919	35	31	14	3	-150	-14007.1	14	3
AB1B-13	297.9	0.934579	0.04616	0.01347	0.0166	0.00547	0.00261	0.00012	0.83	6	394	17	5	16.8	0.8	-1.19048	64.2857	16.8	0.8
AB1B-14	39.4716	0.37594	0.04772	0.12473	0.01241	0.03478	0.00189	0.0004	0.9	85	2653	13	35	12	3	-8.33333	-608.333	12	3
AB1B-15	691.285	0.970874	0.04457	0.00406	0.01856	0.00212	0.00302	8e-05	0.9	-41	166	19	2	19.4	0.5	2.06186	311.34	19.4	0.5
AB1B-16	396.529	0.854701	0.04236	0.0131	0.01166	0.00407	0.002	9e-05	0.9	-157	428	12	4	12.9	0.6	6.97674	1317.05	12.9	0.6
AB1B-17	148.78	0.609756	0.05566	0.06673	0.00652	0.0085	0.00085	0.0001	0.9	439	1602	7	9	5.5	0.6	-27.2727	-7881.82	5.5	0.6
AB1B-18	333.846	0.980392	0.04869	0.01344	0.02195	0.00684	0.00327	0.00014	0.85	133	409	22	7	21	0.9	-4.7619	-533.333	21	0.9
AB1B-19	162.842	0.662252	0.04609	0.02874	0.01222	0.0083	0.00192	0.00012	0.9	2	917	12	8	12.4	0.8	3.22581	83.871	12.4	0.8
AB1B-20	90.4521	0.704225	0.04651	0.0503	0.01455	0.01705	0.00227	0.00023	0.9	24	1239	15	17	15	1	0	-60	15	1
AB1B-21	166.748	0.769231	0.04851	0.02334	0.01506	0.00796	0.00225	0.00012	0.9	124	728	15	8	14.5	0.8	-3.44828	-755.172	14.5	0.8
AB1B-22	407.4	1.03093	0.04196	0.00846	0.01692	0.00392	0.00293	0.0001	0.9	-179	260	17	4	18.9	0.6	10.0529	1047.09	18.9	0.6
AB1B-23	59.8152	0.584795	0.0476	0.11669	0.00822	0.02156	0.00125	0.00024	0.9	79	2560	8	22	8	2	0	-887.5	8	2
AB1B-24	310.948	0.588235	0.04542	0.00853	0.01867	0.00406	0.00298	0.0001	0.9	-33	279	19	4	19.2	0.6	1.04167	271.875	19.2	0.6
AB1B-25	479.398	0.699301	0.04464	0.00519	0.0197	0.00283	0.0032	0.0001	0.9	-38	208	20	3	20.6	0.6	2.91262	284.466	20.6	0.6
AB1B-26	104.989	0.70922	0.04867	0.04154	0.01356	0.01265	0.00202	0.00018	0.9	132	1235	14	13	13	1	-7.69231	-915.385	13	1
AB1B-27	150.048	0.606061	0.04771	0.01625	0.02153	0.00815	0.00327	0.00014	0.9	85	556	22	8	21	0.9	-4.7619	-304.762	21	0.9
AB1B-28	118.023	0.203252	0.14432	0.06272	0.02424	0.01346	0.00122	0.00017	0.89	2280	973	24	13	8	1	-200	-28400	8	1
AB1B-29	86.5665	0.37037	0.07007	0.05837	0.0173	0.01621	0.00179	0.00021	0.9	930	1614	17	16	12	1	-41.6667	-7650	12	1
AB1B-30	379.81	0.704225	0.03905	0.00676	0.0166	0.00335	0.00308	0.0001	0.9	-346	242	17	3	19.8	0.6	14.1414	1847.47	19.8	0.6
AB1B-31	353.649	0.769231	0.05135	0.00702	0.02158	0.00357	0.00305	0.0001	0.9	257	276	22	4	19.6	0.6	-12.2449	-1211.22	19.6	0.6
AB1B-32	95.5857	0.454545	0.1166	0.0315	0.05297	0.01778	0.0033	0.00025	0.91	1905	604	52	17	21	2	-147.619	-8971.43	21	2
AB1B-33	88.6061	0.44843	0.04493	0.04454	0.01279	0.01367	0.00207	0.00018	0.9	-23	1230	13	14	13	1	0	276.923	13	1
AB1B-34	121.561	0.297619	0.03793	0.03291	0.01069	0.00993	0.00204	0.00014	0.9	-414	1049	11	10	13.1	0.9	16.0305	3260.31	13.1	0.9
AB1B-36	170.268	0.364964	0.04792	0.02271	0.01548	0.0081	0.00234	0.00013	0.9	95	740	16	8	15.1	0.8	-5.96026	-529.139	15.1	0.8
AB1B-35	103.857	0.331126	0.052	0.03883	0.01458	0.01191	0.00203	0.00016	0.9	285	1099	15	12	13	1	-15.3846	-2092.31	13	1
AB1B-37	142.313	0.378788	0.10009	0.03189	0.02589	0.01006	0.00188	0.00015	0.9	1626	701	26	10	12.1	1	-114.876	-13338	12.1	1
AB1B-38	74.4136	0.352113	0.09121	0.05165	0.02425	0.01606	0.00193	0.00021	0.9	1451	1247	24	16	12	1	-100	-11991.7	12	1
AB1B-39	51.0161	0.255102	-0.06832	-0.12	-0.01493	0.02399	0.00158	0.00026	0.9	-1636	3661	-15	25	10	2	250	16460	10	2
AB1B-40	1930.04	1.03093	0.03673	0.00162	0.01564	0.00103	0.00309	8e-05	0.9	-5	263	16	1	19.9	0.5	19.598	125.126	19.9	0.5
AB1B-41	55.0907	0.346021	0.0588	0.05628	0.01972	0.02075	0.00243	0.00026	0.9	560	1459	20	21	16	2	-25	-3400	16	2
AB1B-42	143.481	0.598802	0.04156	0.01769	0.01764	0.00822	0.00308	0.00014	0.9	-201	588	18	8	19.8	0.9	9.09091	1115.15	19.8	0.9
AB1B-43	80.667	0.261097	0.16519	1.10822	0.00239	0.0202	0.00011	0.00022	0.9	2509	19209	2	20	1	1	-100	-250800	1	1
AB1B-44	258.338	0.571429	0.04792	0.00927	0.02098	0.0047	0.00318	0.00011	0.9	95	310	21	5	20.5	0.7	-2.43902	-363.415	20.5	0.7
AB1B-45	127.827	0.273224	0.11297	0.03219	0.03018	0.01064	0.00194	0.00015	0.9	1848	667	30	10	12.5	1	-140	-14684	12.5	1
AB1B-46	59.2916	0.135501	0.08354	0.02871	0.05644	0.02275	0.0049	0.00033	0.9	1282	758	56	22	32	2	-75	-3906.25	32	2
AB1B-47	41.5585	0.310559	0.03036	0.09597	0.00873	0.02883	0.00209	0.00033	0.9	-268	2337	9	29	13	2	30.7692	2161.54	13	2
AB1B-48	112.344	0.684932	-0.0345	-0.10667	-0.00366	0.0108	0.00077	0.00012	0.9	-577	2960	-4	11	5	0.8	180	11640	5	0.8
AB1B-49	22.0421	0.271739	0.0689	0.12574	0.02519	0.05087	0.00265	0.00058	0.9	896	2754	25	50	17	4	-47.0588	-5170.59	17	4
AB1B-50	118.454	0.431034	-0.81078	-4.19449	0.0037	0.00853	-3e-05	9e-05	0.9	-9597	19560	4	9	-0.2	0.6	2100	-4798400	-0.2	0.6
AB1B-51	43.3143	0.311526	0.04418	0.07996	0.0132	0.02552	0.00217	0.0003	0.9	-61	1702	13	26	14	2	7.14286	535.714	14	2
AB1B-52	94.6652	0.254453	0.05905	0.03468	0.01682	0.01096	0.00207	0.00015	0.9	569	1045	17	11	13.3	1	-27.8195	-4178.2	13.3	1
AB1B-53	187.233	0.625	0.01416	0.01925	0.00401	0.00561	0.00205	9e-05	0.9	-1080	889	4	6	13.2	0.6	69.697	8281.82	13.2	0.6
AB1B-54	256.768	0.625	0.04685	0.00815	0.0207	0.00417	0.0032	0.0001	0.9	42	283	21	4	20.6	0.6	-1.94175	-103.883	20.6	0.6
AB1B-55	212.58	0.221729	0.07061	0.01733	0.01795	0.00518	0.00184	9e-05	0.9	946	533	18	5	11.9	0.6	-51.2605	-7849.58	11.9	0.6
AB1B-56	181.13	0.485437	0.0493	0.01836	0.01377	0.00567	0.00203	9e-05	0.9	162	587	14	6	13.1	0.6	-6.87023	-1136.64	13.1	0.6
AB1B-57	212.192	0.617284	0.03862	0.01099	0.01591	0.005	0.00299	0.0001	0.9	-371	373	16	5	19.2	0.6	16.6667	2032.29	19.2	0.6
AB1B-58	57.31	0.273973	0.05283	0.06029	0.01431	0.01776	0.00196	0.00022	0.9	322	1473	14	18	13	1	-7.69231	-2376.92	13	1
AB1B-59	82.6625	0.666667	0.03797	0.03691	0.01431	0.01494	0.00273	0.00022	0.9	-411	1163	14	15	18	1	22.2222	2383.33	18	1
AB1B-60	161.223	0.534759	0.05029	0.01355	0.02209	0.00672	0.00319	0.00013	0.86	208	428	22	7	20.5	0.8	-7.31707	-914.634	20.5	0.8
AB1B-61	104.879	0.621118	0.05236	0.03089	0.01573	0.01018	0.00218	0.00014	0.9	301	947	16	10	14	0.9	-14.2857	-2050	14	0.9
AB1B-62	55.0116	0.295858	0.06145	0.07962	0.01328	0.01901	0.00157	0.00024	0.9	655	1947	13	19	10	2	-30	-6450	10	2
AB1B-63	96.0654	0.284091	0.04349	0.01496	0.02963	0.01126	0.00494	0.0002	0.9	-97	506	30	11	32	1	6.25	403.125	32	1
AB1B-64	74.7836	0.4	0.05711	0.06528	0.01125	0.01398	0.00143	0.00016	0.9	496	1567	11	14	9	1	-22.2222	-5411.11	9	1
AB1B-65	320.332	0.632911	0.07361	0.02337	0.01037	0.00383	0.00102	6e-05	0.9	1031	730	10	4	6.6	0.4	-51.5152	-15521.2	6.6	0.4
AB1B-66	88.3116	0.298507	0.07747	0.0433	0.02148	0.0138	0.00201	0.00019	0.9	1133	1154	22	14	13	1	-69.2308	-8615.38	13	1
AB1B-67	75.6931	0.421941	0.05789	0.03042	0.02427	0.01417	0.00304	0.0002	0.9	526	915	24	14	20	1	-20	-2530	20	1
AB1B-68	93.1422	0.348432	0.04659	0.03512	0.01471	0.01206	0.00229	0.00017	0.9	28	1016	15	12	15	1	0	-86.6667	15	1
AB1B-69	225.294	0.581395	0.02337	0.01079	0.00971	0.0048	0.00301	0.00011	0.9	-591	505	10	5	19.4	0.7	48.4536	3146.39	19.4	0.7
AB1B-70	188.031	0.724638	0.0431	0.01708	0.01297	0.00567	0.00218	0.0001	0.9	-118	552	13	6	14	0.6	7.14286	942.857	14	0.6
AB1B-71	85.9325	0.297619	0.03875	0.03425	0.01261	0.01191	0.00236	0.00016	0.9	-364	1077	13	12	15	1	13.3333	2526.67	15	1
AB1B-72	116.514	0.384615	0.05855	0.0176	0.02673	0.00911	0.00331	0.00015	0.9	550	600	27	9	21.3	1	-26.7606	-2482.16	21.3	1
AB1B-73	85.0486	0.27248	0.03313	0.0584	0.00799	0.0149	0.00175	0.0002	0.9	-150	1368	8	15	11	1	27.2727	1463.64	11	1
AB1B-74	62.5231	0.288184	0.06679	0.05884	0.01938	0.01904	0.0021	0.00024	0.9	831	1604	19	19	14	2	-35.7143	-5835.71	14	2
AB1B-75	75.6623	0.234742	0.04676	0.01862	0.03454	0.01524	0.00536	0.00026	0.9	37	602	34	15	34	2	0	-8.82353	34	2
AB1B-76	60.1429	0.322581	-0.044	-0.07379	-0.01142	0.01794	0.00188	0.00022	0.9	-849	1960	-12	18	12	1	200	7175	12	1
AB1B-77	30.0158	0.298507	0.16066	0.41736	0.01331	0.04366	0.0006	0.00047	0.9	2463	5366	13	44	4	3	-225	-61475	4	3
AB1B-78	67.3637	0.246305	0.1463	0.05368	0.04287	0.02061	0.00213	0.00028	0.9	2303	890	43	20	14	2	-207.143	-16350	14	2
AB1B-79	59.4751	0.44843	0.08201	0.16261	0.00816	0.01809	0.00072	0.00019	0.9	1246	3572	8	18	5	1	-60	-24820	5	1
AB1B-80	811.697	0.740741	0.03682	0.00282	0.01537	0.00153	0.00303	8e-05	0.9	-1	261	15	2	19.5	0.5	23.0769	105.128	19.5	0.5
AB1B-81	290.567	0.403226	0.04615	0.01108	0.0122	0.00335	0.00192	8e-05	0.82	6	328	12	3	12.4	0.5	3.22581	51.6129	12.4	0.5
AB1B-82	157.069	0.344828	0.03934	0.01428	0.01681	0.00668	0.0031	0.00012	0.9	-328	463	17	7	20	0.8	15	1740	20	0.8
AB1B-83	259.438	0.609756	0.03667	0.0109	0.01631	0.00543	0.00323	0.00013	0.9	-7	443	16	5	20.8	0.8	23.0769	133.654	20.8	0.8
AB1B-84	218.23	0.558659	0.0461	0.01034	0.01314	0.00332	0.00207	8e-05	0.8	3	305	13	3	13.3	0.5	2.25564	77.4436	13.3	0.5
AB1B-85	106.838	0.340136	0.02503	0.02345	0.01087	0.01071	0.00315	0.00017	0.9	-511	908	11	11	20	1	45	2655	20	1
AB1B-86	35.0846	0.374532	0.03927	0.12937	0.00916	0.03192	0.00169	0.00036	0.9	-333	2937	9	32	11	2	18.1818	3127.27	11	2
AB1B-87	335.29	0.649351	0.02933	0.00777	0.01214	0.00354	0.003	9e-05	0.9	-313	330	12	4	19.3	0.6	37.8238	1721.76	19.3	0.6
AB1B-88	178.748	0.694444	0.01193	0.02802	0.00334	0.00805	0.00203	0.00014	0.9	-1211	927	3	8	13.1	0.9	77.0992	9344.27	13.1	0.9
AB1B-89	69.1868	0.45045	0.03328	0.04494	0.01232	0.01758	0.00269	0.00023	0.9	-144	1178	12	18	17	1	29.4118	947.059	17	1
AB1B-90	36.6822	0.186567	0.03731	0.06084	0.02105	0.03653	0.00409	0.00048	0.9	-452	1413	21	36	26	3	19.2308	1838.46	26	3
AB1B-91	23.621	0.284091	0.00498	0.06962	0.0034	0.04789	0.00496	0.00058	0.9	-1657	1951	3	48	32	4	90.625	5278.12	32	4
AB1B-92	332.083	0.609756	0.05066	0.00788	0.02132	0.00393	0.00305	0.0001	0.9	225	328	21	4	19.6	0.6	-7.14286	-1047.96	19.6	0.6
AB1B-93	153.282	0.327869	0.05003	0.01933	0.0164	0.00701	0.00238	0.00011	0.9	196	659	17	7	15.3	0.7	-11.1111	-1181.05	15.3	0.7
AB1B-94	159.312	0.581395	0.04213	0.09595	0.00393	0.00957	0.00068	0.00012	0.9	-170	2091	4	10	4.4	0.8	9.09091	3963.64	4.4	0.8
AB1B-95	58.3991	0.404858	0.0488	0.07803	0.01074	0.01849	0.0016	0.00022	0.9	138	1734	11	19	10	1	-10	-1280	10	1
AB1B-96	224.109	0.729927	0.00961	0.01694	0.00273	0.00492	0.00206	9e-05	0.9	-1354	880	3	5	13.3	0.6	77.4436	10280.5	13.3	0.6
AB1B-97	66.1119	0.49505	0.04527	0.11288	0.00632	0.01682	0.00101	0.00019	0.9	-6	2544	6	17	7	1	14.2857	185.714	7	1
AB1B-98	51.2555	0.304878	0.10075	0.11529	0.0234	0.03156	0.00168	0.00039	0.9	1638	2132	23	31	11	3	-109.091	-14790.9	11	3
AB1B-99	107.797	0.17762	0.04322	0.01914	0.02156	0.01045	0.00362	0.00017	0.9	-111	692	22	10	23	1	4.34783	582.609	23	1
AB1B-100	212.758	0.793651	0.04187	0.01587	0.01279	0.00536	0.00222	0.0001	0.9	-184	574	13	5	14.3	0.6	9.09091	1386.71	14.3	0.6
AB1B-101	981.162	0.588235	0.04063	0.00333	0.01158	0.00124	0.00207	6e-05	0.9	-254	167	12	1	13.3	0.4	9.77444	2009.77	13.3	0.4
AB1B-102	52.9339	0.373134	0.04349	0.02718	0.03093	0.02093	0.00516	0.0003	0.9	-97	977	31	21	33	2	6.06061	393.939	33	2
AB1B-103	90.8386	0.617284	0.088	0.03676	0.02786	0.01356	0.0023	0.00018	0.9	1382	909	28	13	15	1	-86.6667	-9113.33	15	1
AB1B-104	2803.64	0.0628536	0.03843	0.00233	0.01169	0.00098	0.00221	6e-05	0.9	-383	206	11.8	1	14.2	0.4	16.9014	2797.18	14.2	0.4
AB1B-105	742.374	0.0580046	0.04323	0.00313	0.01737	0.00167	0.00291	8e-05	0.9	-111	156	17	2	18.7	0.5	9.09091	693.583	18.7	0.5
AB1B-106	91.667	0.409836	0.09399	0.03095	0.03086	0.01199	0.00238	0.00016	0.9	1508	706	31	12	15	1	-106.667	-9953.33	15	1
AB1B-107	60.0696	0.352113	0.11118	0.06034	0.0281	0.01822	0.00183	0.00022	0.9	1819	1237	28	18	12	1	-133.333	-15058.3	12	1
AB1B-108	155.286	0.735294	0.06227	0.01462	0.02697	0.00732	0.00314	0.00013	0.9	683	498	27	7	20.2	0.8	-33.6634	-3281.19	20.2	0.8

## Sheet: AG-01
Supplementary Table A.1 U-Pb ages of detrital zircons from every sample
Spot	U(ppm)	Th/U	U-Th-Pb ratios							Ages (Ma)						Discordance		Inferred Age (Ma)	1σ
			207Pb/206Pb	1σ	207Pb/235U	1σ	206Pb/238U	1σ	rr	207Pb/206Pb	1σ	207Pb/235U	1σ	206Pb/238U	1σ	<1000 Ma	>1000 Ma
AG01-01	266.27	0.558659	0.05689	0.00881	0.02977	0.00544	0.0038	0.00012	0.9	487	320	30	5	24.4	0.8	-22.9508	-1895.9	24.4	0.8
AG01-02	45.8393	0.416667	0.06775	0.08522	0.02252	0.0314	0.00241	0.00037	0.9	861	1800	23	31	16	2	-43.75	-5281.25	16	2
AG01-03	35.8368	0.520833	0.45812	0.97467	0.00948	0.04041	0.00015	0.00042	0.9	4112	15663	10	41	1	3	-900	-411100	1	3
AG01-04	780.735	1.14943	0.02991	0.00449	0.0096	0.00166	0.00233	6e-05	0.9	-288	175	10	2	15	0.4	33.3333	2020	15	0.4
AG01-05	102.338	0.34965	0.06073	0.04321	0.0158	0.01248	0.00189	0.00017	0.88	630	1095	16	12	12	1	-33.3333	-5150	12	1
AG01-06	203.655	0.409836	0.04236	0.01067	0.02534	0.00716	0.00434	0.00015	0.9	-157	367	25	7	27.9	1	10.3943	662.724	27.9	1
AG01-07	292.52	0.961538	0.06002	0.00832	0.02684	0.00445	0.00324	0.0001	0.9	604	300	27	4	20.9	0.6	-29.1866	-2789.95	20.9	0.6
AG01-08	207.604	0.411523	0.06166	0.01845	0.02213	0.0076	0.0026	0.00013	0.9	662	570	22	8	16.7	0.8	-31.7365	-3864.07	16.7	0.8
AG01-09	92.1253	0.393701	0.04923	0.03633	0.01708	0.01363	0.00252	0.00017	0.9	159	1006	17	14	16	1	-6.25	-893.75	16	1
AG01-10	114.605	0.387597	0.13073	0.03533	0.0415	0.01405	0.0023	0.00018	0.9	2108	554	41	14	15	1	-173.333	-13953.3	15	1
AG01-11	84.2367	0.425532	0.10543	0.04504	0.03184	0.01616	0.00219	0.0002	0.9	1722	995	32	16	14	1	-128.571	-12200	14	1
AG01-12	45.9471	0.260417	0.12544	0.0677	0.04457	0.02891	0.00258	0.00032	0.9	2035	1198	44	28	17	2	-158.824	-11870.6	17	2
AG01-13	25.1629	0.297619	0.23737	0.08694	0.11612	0.06169	0.00355	0.00069	0.9	3102	817	112	56	23	4	-386.957	-13387	23	4
AG01-14	46.6118	0.301205	0.04766	0.08767	0.01561	0.03077	0.00237	0.00035	0.9	82	1981	16	31	15	2	-6.66667	-446.667	15	2
AG01-15	39.0228	0.341297	0.04133	0.09567	0.01331	0.03269	0.00234	0.00037	0.9	-214	2274	13	33	15	2	13.3333	1526.67	15	2
AG01-16	439.157	1.11111	0.05297	0.00762	0.02031	0.0035	0.00278	9e-05	0.9	328	293	20	3	17.9	0.6	-11.7318	-1732.4	17.9	0.6
AG01-17	59.0366	0.325733	0.05154	0.0554	0.01863	0.02161	0.00262	0.00025	0.9	265	1314	19	22	17	2	-11.7647	-1458.82	17	2
AG01-18	91.7193	0.353357	0.05552	0.03791	0.01875	0.01396	0.00245	0.00017	0.9	433	1095	19	14	16	1	-18.75	-2606.25	16	1
AG01-19	95.1765	0.346021	0.03253	0.03586	0.0115	0.01336	0.00256	0.00017	0.9	-175	1045	12	13	16	1	25	1193.75	16	1
AG01-20	162.001	0.900901	0.04894	0.01686	0.02128	0.00811	0.00315	0.00013	0.9	145	575	21	8	20.3	0.8	-3.44828	-614.286	20.3	0.8
AG01-21	242.2	0.606061	0.03075	0.01849	0.00958	0.00614	0.00226	0.0001	0.9	-251	702	10	6	14.6	0.6	31.5068	1819.18	14.6	0.6
AG01-22	56.6405	0.292398	0.15316	0.0526	0.05612	0.02477	0.00266	0.0003	0.9	2382	734	55	24	17	2	-223.529	-13911.8	17	2
AG01-23	42.576	0.288184	0.01238	0.07625	0.00501	0.03141	0.00293	0.00036	0.9	-1185	1972	5	32	19	2	73.6842	6336.84	19	2
AG01-24	93.3915	0.340136	0.05984	0.06775	0.01673	0.02084	0.00203	0.00027	0.87	598	1267	17	21	13	2	-30.7692	-4500	13	2
AG01-25	409.582	0.438596	0.04458	0.00599	0.02143	0.00342	0.00349	0.0001	0.9	-41	224	22	3	22.5	0.6	2.22222	282.222	22.5	0.6
AG01-26	54.3421	0.342466	0.06685	0.18993	0.01164	0.03652	0.00126	0.00042	0.9	833	2922	12	37	8	3	-50	-10312.5	8	3
AG01-27	61.7398	0.269542	0.07252	0.10236	0.02072	0.03271	0.00207	0.00039	0.9	1001	2248	21	33	13	3	-61.5385	-7600	13	3
AG01-28	49.5118	0.378788	0.05085	0.4292	0.00338	0.03054	0.00048	0.00032	0.9	234	5233	3	31	3	2	0	-7700	3	2
AG01-29	28.5973	0.288184	0.03352	0.13265	0.01584	0.06566	0.00343	0.00072	0.9	-134	2943	16	66	22	5	27.2727	709.091	22	5
AG01-30	116.101	0.440529	0.02016	0.06191	0.00595	0.01887	0.00214	0.00024	0.9	-753	1521	6	19	14	2	57.1429	5478.57	14	2
AG01-31	73.8026	0.416667	0.1086	0.22072	0.02412	0.05786	0.00161	0.00067	0.9	1776	3126	24	57	10	4	-140	-17660	10	4
AG01-32	192.946	0.307692	0.02641	0.01438	0.01281	0.0074	0.00352	0.00013	0.9	-446	627	13	7	22.7	0.8	42.7313	2064.76	22.7	0.8
AG01-33	32.0065	0.254453	0.08051	0.24329	0.01397	0.04733	0.00126	0.00052	0.9	1210	3391	14	47	8	3	-75	-15025	8	3
AG01-34	178.885	0.694444	0.03803	0.02393	0.01171	0.00793	0.00223	0.00012	0.9	-407	857	12	8	14.4	0.8	16.6667	2926.39	14.4	0.8
AG01-35	180.505	0.574713	0.03645	0.01794	0.01443	0.00764	0.00287	0.00012	0.9	-16	709	15	8	18.5	0.8	18.9189	186.486	18.5	0.8
AG01-36	214.045	0.280899	0.07222	0.20048	0.00221	0.00676	0.00022	7e-05	0.9	992	3124	2	7	1.4	0.5	-42.8571	-70757.1	1.4	0.5
AG01-37	37.0587	0.288184	0.27762	0.10141	0.077	0.04439	0.00201	0.00051	0.9	3350	807	75	42	13	3	-476.923	-25669.2	13	3
AG01-39	37.8647	0.306748	0.0428	0.14364	0.01268	0.04519	0.00215	0.0005	0.9	-134	3206	13	45	14	3	7.14286	1057.14	14	3
AG01-40	37.068	0.268817	0.1923	0.0845	0.08017	0.04757	0.00302	0.00054	0.9	2762	1037	78	45	19	3	-310.526	-14436.8	19	3
AG01-41	53.6492	0.384615	0.03397	0.07753	0.01217	0.0292	0.0026	0.00034	0.9	-115	1770	12	29	17	2	29.4118	776.471	17	2
AG01-42	31.874	0.3125	0.05748	0.09052	0.03008	0.05139	0.0038	0.00057	0.9	510	1997	30	51	24	4	-25	-2025	24	4
AG01-43	227.458	0.260417	0.01711	0.02529	0.00574	0.00878	0.00244	0.00014	0.9	-915	893	6	9	15.7	0.9	61.7834	5928.03	15.7	0.9
AG01-44	203.633	0.653595	0.03375	0.02247	0.013	0.00928	0.00279	0.00015	0.9	-125	828	13	9	18	1	27.7778	794.444	18	1
AG01-45	152.338	0.653595	0.05978	0.03128	0.01907	0.01115	0.00231	0.00016	0.9	596	928	19	11	15	1	-26.6667	-3873.33	15	1
AG01-46	55.0746	0.273224	0.04487	0.08235	0.01523	0.02983	0.00246	0.00034	0.9	-26	1870	15	30	16	2	6.25	262.5	16	2
AG01-47	256.065	0.480769	0.04035	0.02093	0.01308	0.00738	0.00235	0.00012	0.9	-270	747	13	7	15.1	0.8	13.9073	1888.08	15.1	0.8
AG01-48	331.208	0.588235	0.04338	0.00867	0.02016	0.00461	0.00337	0.00011	0.9	-103	302	20	5	21.7	0.7	7.8341	574.654	21.7	0.7
AG01-49	45.4594	0.255754	0.11945	0.11091	0.05194	0.05807	0.00315	0.00068	0.9	1948	2018	51	56	20	4	-155	-9640	20	4
AG01-50	106.395	0.657895	0.04735	0.03765	0.01978	0.01701	0.00303	0.00022	0.9	67	1023	20	17	20	1	0	-235	20	1
AG01-51	58.1546	0.328947	0.04327	0.31624	0.00983	0.07642	0.00165	0.00086	0.9	-109	4346	10	77	11	6	9.09091	1090.91	11	6
AG01-52	52.1924	0.271739	0.11974	0.11854	0.0372	0.04409	0.00225	0.0005	0.9	1952	2175	37	43	14	3	-164.286	-13842.9	14	3
AG01-53	68.8361	0.331126	0.04324	0.06736	0.01479	0.02453	0.00248	0.00028	0.9	-110	1599	15	25	16	2	6.25	787.5	16	2
AG01-54	155.9	0.384615	0.07056	0.03288	0.02063	0.01082	0.00212	0.00014	0.9	945	903	21	11	13.7	0.9	-53.2847	-6797.81	13.7	0.9
AG01-55	74.0908	0.215054	0.12032	0.04796	0.07191	0.03533	0.00434	0.00046	0.9	1961	925	71	33	28	3	-153.571	-6903.57	28	3
AG01-56	43.8811	0.283286	0.05136	0.12393	0.01566	0.04063	0.00221	0.00045	0.9	257	2608	16	41	14	3	-14.2857	-1735.71	14	3
AG01-57	70.7322	0.274725	0.04992	0.06418	0.01907	0.02642	0.00277	0.00031	0.9	191	1451	19	26	18	2	-5.55556	-961.111	18	2
AG01-58	45.6754	0.320513	0.04159	0.13151	0.01422	0.04768	0.00248	0.00053	0.9	-200	2768	14	48	16	3	12.5	1350	16	3
AG01-59	43.6932	0.369004	0.04107	0.10607	0.01591	0.04352	0.00281	0.00048	0.9	-229	2708	16	43	18	3	11.1111	1372.22	18	3
AG01-60	64.5382	0.490196	0.02963	0.07324	0.01213	0.0313	0.00297	0.00036	0.9	-300	1697	12	31	19	2	36.8421	1678.95	19	2
AG01-61	198.296	0.704225	0.08698	0.0241	0.02917	0.00956	0.00243	0.00014	0.9	1360	575	29	9	15.6	0.9	-85.8974	-8617.95	15.6	0.9
AG01-62	78.0401	0.246305	0.04241	0.10267	0.01196	0.03083	0.00205	0.00036	0.9	-155	2526	12	31	13	2	7.69231	1292.31	13	2
AG01-63	34.6917	0.239808	0.07183	0.15472	0.02044	0.0487	0.00206	0.00053	0.9	981	3170	21	48	13	3	-61.5385	-7446.15	13	3
AG01-64	74.9602	0.208333	0.02465	0.14311	0.00824	0.04963	0.00243	0.00059	0.9	-529	3611	8	50	16	4	50	3406.25	16	4
AG01-65	219.741	0.78125	0.01618	0.02364	0.00614	0.00927	0.00275	0.00015	0.9	-966	883	6	9	17.7	1	66.1017	5557.63	17.7	1
AG01-66	201.461	0.526316	0.05572	0.02722	0.01788	0.00969	0.00233	0.00014	0.9	441	851	18	10	15	0.9	-20	-2840	15	0.9
AG01-67	50.0627	0.423729	0.01932	0.11211	0.00584	0.03482	0.00219	0.00039	0.9	-796	2655	6	35	14	3	57.1429	5785.71	14	3
AG01-68	195.22	0.657895	0.03853	0.04414	0.01047	0.0128	0.00197	0.00017	0.9	-377	1214	11	13	13	1	15.3846	3000	13	1
AG01-69	95.216	0.37594	0.04725	0.06517	0.01761	0.02615	0.0027	0.00032	0.9	62	1508	18	26	17	2	-5.88235	-264.706	17	2
AG01-70	30.1116	0.331126	0.04401	0.2578	0.00955	0.05942	0.00157	0.00064	0.9	-70	3635	10	60	10	4	0	800	10	4
AG01-71	78.5525	0.265957	0.05553	0.06195	0.01871	0.02265	0.00244	0.00026	0.9	434	1397	19	23	16	2	-18.75	-2612.5	16	2
AG01-72	176.408	1.0101	0.06441	0.02655	0.02905	0.01355	0.00327	0.0002	0.9	755	818	29	13	21	1	-38.0952	-3495.24	21	1
AG01-73	48.8616	0.322581	0.05426	0.1068	0.01966	0.04183	0.00263	0.00047	0.9	382	2523	20	42	17	3	-17.6471	-2147.06	17	3
AG01-74	334.185	0.465116	0.01741	0.01682	0.00611	0.00614	0.00255	0.00011	0.9	-899	730	6	6	16.4	0.7	63.4146	5581.71	16.4	0.7
AG01-75	69.2025	0.25641	0.06835	0.07112	0.02534	0.02913	0.00269	0.00033	0.9	879	1474	25	29	17	2	-47.0588	-5070.59	17	2
AG01-76	104.648	0.465116	0.06121	0.07554	0.01928	0.0262	0.00228	0.00032	0.9	647	1603	19	26	15	2	-26.6667	-4213.33	15	2
AG01-77	107.938	0.358423	0.02424	0.05795	0.0086	0.02134	0.00257	0.00026	0.9	-549	1390	9	21	17	2	47.0588	3329.41	17	2
AG01-78	62.0237	0.534759	0.04481	0.10159	0.01325	0.03203	0.00214	0.00036	0.9	-29	2439	13	32	14	2	7.14286	307.143	14	2
AG01-79	107.876	0.515464	0.07449	0.0626	0.02227	0.02099	0.00217	0.00025	0.9	1055	1345	22	21	14	2	-57.1429	-7435.71	14	2
AG01-80	113.205	0.478469	0.05735	0.07258	0.01821	0.02523	0.0023	0.00031	0.9	505	1577	18	25	15	2	-20	-3266.67	15	2
AG01-81	170.878	0.854701	0.04947	0.0292	0.02041	0.0132	0.00299	0.00019	0.9	170	910	21	13	19	1	-10.5263	-794.737	19	1
AG01-82	55.0702	0.383142	0.04787	0.27402	0.00945	0.05781	0.00143	0.00063	0.9	93	3805	10	58	9	4	-11.1111	-933.333	9	4
AG01-83	64.948	0.358423	0.0513	0.04529	0.03696	0.03546	0.00523	0.00045	0.9	254	1146	37	35	34	3	-8.82353	-647.059	34	3
AG01-84	188.928	0.699301	0.04607	0.01358	0.01131	0.00368	0.00178	0.0001	0.6	1	415	11	4	11.5	0.6	4.34783	91.3043	11.5	0.6
AG01-85	180.19	0.384615	0.08053	0.03915	0.02083	0.0115	0.00188	0.00014	0.9	1210	955	21	11	12.1	0.9	-73.5537	-9900	12.1	0.9
AG01-86	148.834	0.526316	0.0429	0.04364	0.01551	0.01694	0.00262	0.00022	0.9	-128	1180	16	17	17	1	5.88235	852.941	17	1
AG01-87	53.1321	0.369004	0.31448	0.2113	0.05514	0.06067	0.00127	0.00066	0.9	3543	2558	54	58	8	4	-575	-44187.5	8	4
AG01-88	114.808	0.361011	0.04931	0.0262	0.03534	0.02053	0.0052	0.00029	0.9	163	833	35	20	33	2	-6.06061	-393.939	33	2
AG01-89	51.6157	0.291545	0.04184	0.08573	0.01912	0.04155	0.00331	0.00046	0.9	-186	1956	19	41	21	3	9.52381	985.714	21	3
AG01-90	78.1366	0.314465	0.08996	0.13827	0.02229	0.03919	0.0018	0.00045	0.9	1425	2872	22	39	12	3	-83.3333	-11775	12	3
AG01-91	38.2071	0.362319	0.0671	0.11176	0.0336	0.06164	0.00363	0.00069	0.9	841	2634	34	61	23	4	-47.8261	-3556.52	23	4
AG01-92	194.736	0.456621	0.07838	0.02768	0.02752	0.01115	0.00255	0.00015	0.9	1157	727	28	11	16.4	1	-70.7317	-6954.88	16.4	1
AG01-93	53.9764	0.320513	0.06696	0.13493	0.02345	0.05226	0.00254	0.00061	0.9	837	2757	24	52	16	4	-50	-5131.25	16	4
AG01-94	114.09	0.694444	0.04142	0.05531	0.01705	0.02435	0.00298	0.00031	0.9	-209	1353	17	24	19	2	10.5263	1200	19	2
AG01-95	99.4591	0.306748	0.03448	0.06123	0.01201	0.02243	0.00253	0.00026	0.9	-95	1468	12	23	16	2	25	693.75	16	2
AG01-96	113.42	0.60241	0.10103	0.05678	0.04076	0.02719	0.00293	0.00035	0.9	1643	1197	41	27	19	2	-115.789	-8547.37	19	2
AG01-97	75.1486	0.364964	0.07909	0.09025	0.03093	0.03983	0.00284	0.00047	0.9	1174	1825	31	39	18	3	-72.2222	-6422.22	18	3
AG01-98	133.032	0.877193	0.20819	0.05449	0.07239	0.02706	0.00252	0.00031	0.93	2891	479	71	26	16	2	-343.75	-17968.8	16	2
AG01-99	55.1619	0.49505	0.06444	0.89895	0.00275	0.04176	0.00031	0.00043	0.9	756	15022	3	42	2	3	-50	-37700	2	3
AG01-100	54.5037	0.380228	0.0584	0.16828	0.02457	0.07704	0.00305	0.00087	0.9	545	3454	25	76	20	6	-25	-2625	20	6
AG01-101	37.2873	0.258398	0.05737	0.19739	0.01672	0.06233	0.00211	0.00068	0.9	506	3086	17	62	14	4	-21.4286	-3514.29	14	4
AG01-102	66.8751	0.47619	0.07418	0.08275	0.02998	0.03735	0.00293	0.00043	0.9	1046	1712	30	37	19	3	-57.8947	-5405.26	19	3
AG01-103	45.2882	0.280112	0.06609	0.18309	0.02065	0.06279	0.00227	0.00069	0.9	809	3338	21	62	15	4	-40	-5293.33	15	4
AG01-104	19.8914	0.301205	0.05966	0.39869	0.01566	0.11339	0.0019	0.00119	0.9	591	4841	16	113	12	8	-33.3333	-4825	12	8
AG01-105	29.5324	0.302115	0.10145	0.12882	0.07439	0.11	0.00532	0.00126	0.9	1651	2843	73	104	34	8	-114.706	-4755.88	34	8
AG01-106	625.994	0.268817	0.04304	0.29293	0.00066	0.00476	0.00011	5e-05	0.9	-121	4092	1	5	0.7	0.3	-42.8571	17385.7	0.7	0.3
AG01-107	559.05	0.584795	0.03533	0.00743	0.01663	0.00397	0.00341	0.00011	0.9	-60	277	17	4	21.9	0.7	22.3744	373.973	21.9	0.7
AG01-108	33.7523	0.398406	0.06686	0.19425	0.03831	0.1226	0.00416	0.00138	0.9	833	3034	38	120	27	9	-40.7407	-2985.19	27	9
Ages assumed < 0.5 Ma
AG01-38	67.6132	0.498619

## Sheet: MG-02
Supplementary Table A.1 U-Pb ages of detrital zircons from every sample
Spot	U(ppm)	Th/U	U-Th-Pb ratios							Ages (Ma)						Discordance		Inferred Age (Ma)	1σ
			207Pb/206Pb	1σ	207Pb/235U	1σ	206Pb/238U	1σ	pr	207Pb/206Pb	1σ	207Pb/235U	1σ	206Pb/238U	1σ	<1000 Ma	>1000 Ma
MG02-01	121.391	0.282486	0.06864	0.01869	0.03273	0.01018	0.00346	0.00016	0.88	888	590	33	10	22	1	-50	-3936.36	22	1
MG02-02	101.921	0.298507	0.06017	0.02154	0.03626	0.01458	0.00437	0.00023	0.85	610	684	36	14	28	1	-28.5714	-2078.57	28	1
MG02-04	443.946	0.510204	0.03814	0.0052	0.02442	0.00393	0.00464	0.00013	0.9	-401	255	24	4	29.8	0.8	19.4631	1445.64	29.8	0.8
MG02-05	103.142	0.456621	0.05269	0.0189	0.03366	0.01343	0.00463	0.00021	0.9	315	632	34	13	30	1	-13.3333	-950	30	1
MG02-06	216.338	0.425532	0.03216	0.00983	0.02037	0.00682	0.0046	0.00015	0.9	-191	398	20	7	29.6	1	32.4324	745.27	29.6	1
MG02-07	75.4249	0.350877	0.07363	0.01544	0.07473	0.01836	0.00736	0.0003	0.9	1031	472	73	17	47	2	-55.3191	-2093.62	47	2
MG02-08	110.106	0.223714	0.06842	0.01571	0.06119	0.01633	0.00649	0.00028	0.88	881	495	60	16	42	2	-42.8571	-1997.62	42	2
MG02-09	40.9331	0.278552	0.08331	0.04884	0.0674	0.04699	0.00587	0.00074	0.9	1276	1219	66	45	38	5	-73.6842	-3257.89	38	5
MG02-10	43.8007	0.3663	0.07212	0.04944	0.04467	0.03424	0.00449	0.00041	0.9	989	1337	44	33	29	3	-51.7241	-3310.34	29	3
MG02-11	1097.44	0.0959693	0.01289	0.0659	0.00033	0.00172	0.00018	2e-05	0.9	-1154	1796		2	1.2	0.1	100	96266.7	1.2	0.1
MG02-12	74.3679	0.147059	0.10196	0.03281	0.05984	0.02332	0.00426	0.00033	0.9	1660	719	59	22	27	2	-118.519	-6048.15	27	2
MG02-13	204.316	0.406504	0.0429	0.00686	0.03902	0.00728	0.0066	0.0002	0.9	-128	241	39	7	42	1	7.14286	404.762	42	1
MG02-14	296.055	0.628931	0.05236	0.00776	0.02904	0.00513	0.00402	0.00013	0.9	301	310	29	5	25.9	0.8	-11.9691	-1062.16	25.9	0.8
MG02-15	372.941	0.584795	0.04346	0.0053	0.02742	0.00403	0.00458	0.00013	0.9	-99	199	27	4	29.5	0.8	8.47458	435.593	29.5	0.8
MG02-16	48.2333	0.282486	0.09244	0.04633	0.05734	0.03346	0.0045	0.00042	0.9	1476	1092	57	32	29	3	-96.5517	-4989.66	29	3
MG02-17	232.235	0.301205	0.05571	0.00748	0.04769	0.00748	0.00621	0.00017	0.85	441	297	47	7	40	1	-17.5	-1002.5	40	1
MG02-18	341.889	0.636943	0.04719	0.00576	0.03016	0.00426	0.00464	0.00012	0.78	59	247	30	4	29.8	0.8	-0.671141	-97.9866	29.8	0.8
MG02-19	332.139	0.694444	0.05016	0.0043	0.04301	0.00471	0.00622	0.00017	0.9	202	197	43	5	40	1	-7.5	-405	40	1
MG02-20	135.642	0.257732	0.04784	0.01452	0.03049	0.01031	0.00462	0.00018	0.9	91	520	30	10	30	1	0	-203.333	30	1
MG02-21	193.497	0.438596	0.06133	0.00669	0.05868	0.00795	0.00694	0.00021	0.9	651	244	58	8	45	1	-28.8889	-1346.67	45	1
MG02-22	94.7006	0.223714	0.07399	0.04193	0.0243	0.01549	0.00238	0.00019	0.9	1041	1109	24	15	15	1	-60	-6840	15	1
MG02-23	187.121	0.249377	0.04623	0.00717	0.04383	0.00798	0.00688	0.00021	0.9	10	291	44	8	44	1	0	77.2727	44	1
MG02-24	25.2446	0.409836	0.14525	0.03966	0.17207	0.0592	0.00859	0.0007	0.9	2291	553	161	51	55	4	-192.727	-4065.45	55	4
MG02-25	298.326	0.280899	0.04853	0.03076	0.01503	0.0103	0.00225	0.00013	0.9	125	1010	15	10	14.5	0.8	-3.44828	-762.069	14.5	0.8
MG02-26	105.678	0.252525	0.06013	0.03592	0.04224	0.02774	0.0051	0.00034	0.9	608	1079	42	27	33	2	-27.2727	-1742.42	33	2
MG02-27	106.365	0.306748	0.06809	0.0329	0.05494	0.02963	0.00585	0.00037	0.9	871	988	54	29	38	2	-42.1053	-2192.11	38	2
MG02-28	101.356	0.392157	0.04929	0.02991	0.0386	0.02536	0.00568	0.00032	0.9	162	970	38	25	37	2	-2.7027	-337.838	37	2
MG02-31	88.11	0.291545	0.06958	0.0325	0.06014	0.03133	0.00627	0.00038	0.9	916	949	59	30	40	2	-47.5	-2190	40	2
MG02-32	781.509	1.05263	0.04311	0.00282	0.04122	0.00362	0.00694	0.00018	0.9	-117	141	41	4	45	1	8.88889	360	45	1
MG02-33	69.314	0.309598	0.05141	0.05281	0.03429	0.03788	0.00484	0.00042	0.9	259	1337	34	37	31	3	-9.67742	-735.484	31	3
MG02-34	245.16	0.568182	0.05432	0.00096	0.52577	0.01886	0.07021	0.00168	0.9	384	41	429	13	437	10	1.83066	12.1281	437	10
MG02-35	446.015	0.383142	0.04099	0.00786	0.02634	0.00575	0.00466	0.00014	0.9	-233	306	26	6	30	0.9	13.3333	876.667	30	0.9
MG02-36	150.184	0.456621	0.04609	0.01145	0.04434	0.01201	0.00698	0.0002	0.79	2	406	44	12	45	1	2.22222	95.5556	45	1
MG02-37	280.046	0.478469	0.02241	0.00809	0.02067	0.00801	0.00669	0.0002	0.9	-638	386	21	8	43	1	51.1628	1583.72	43	1
MG02-38	1925.33	0.740741	0.04729	0.00162	0.02515	0.0014	0.00386	0.0001	0.9	64	78	25	1	24.8	0.6	-0.806452	-158.065	24.8	0.6
MG02-39	135.098	0.442478	0.08726	0.04151	0.02963	0.01612	0.00246	0.00019	0.9	1366	1003	30	16	16	1	-87.5	-8437.5	16	1
MG02-40	130.795	0.537634	0.07457	0.01591	0.06847	0.01706	0.00666	0.00027	0.9	1057	457	67	16	43	2	-55.814	-2358.14	43	2
MG02-41	259.441	0.719424	0.04095	0.0133	0.02431	0.00865	0.00431	0.00015	0.9	-235	497	24	9	27.7	1	13.3574	948.375	27.7	1
MG02-42	23.8102	0.27027	0.0539	0.08698	0.05492	0.09558	0.00739	0.00105	0.9	367	1933	54	92	47	7	-14.8936	-680.851	47	7
MG02-43	101.547	0.33557	0.0142	0.03105	0.01026	0.02296	0.00524	0.0003	0.9	-1078	1106	10	23	34	2	70.5882	3270.59	34	2
MG02-44	128.965	0.490196	0.04503	0.02615	0.02921	0.01829	0.0047	0.00024	0.9	-18	897	29	18	30	2	3.33333	160	30	2
MG02-45	511.666	0.740741	0.02841	0.00486	0.02487	0.00488	0.00635	0.00018	0.9	-355	200	25	5	41	1	39.0244	965.854	41	1
MG02-46	79.1367	0.406504	0.03023	0.0404	0.02013	0.02821	0.00483	0.00035	0.9	-274	1202	20	28	31	2	35.4839	983.871	31	2
MG02-49	583.369	0.680272	0.03389	0.00364	0.03104	0.00407	0.00664	0.00018	0.9	-119	160	31	4	43	1	27.907	376.744	43	1
MG02-50	74.0248	0.60241	0.0431	0.08039	0.01663	0.03298	0.0028	0.00037	0.9	-118	1856	17	33	18	2	5.55556	755.556	18	2
MG02-52	210.598	0.662252	0.0993	0.01132	0.0977	0.01394	0.00714	0.00024	0.9	1611	222	95	13	46	2	-106.522	-3402.17	46	2
MG02-54	37.7119	0.303951	0.12423	0.06532	0.1299	0.08302	0.00758	0.00098	0.9	2018	1206	124	75	49	6	-153.061	-4018.37	49	6
MG02-55	523.925	0.892857	0.20231	0.03884	0.13031	0.03349	0.00467	0.00034	0.93	2845	340	124	30	30	2	-313.333	-9383.33	30	2
MG02-56	145.688	0.338983	0.06123	0.01687	0.05445	0.01702	0.00645	0.00027	0.9	647	547	54	16	41	2	-31.7073	-1478.05	41	2
MG02-57	80.7062	0.487805	0.05497	0.02701	0.05507	0.02975	0.00727	0.0004	0.9	411	901	54	29	47	3	-14.8936	-774.468	47	3
MG02-58	96.6667	0.277778	0.04495	0.04777	0.03394	0.03894	0.00548	0.00052	0.9	-22	1292	34	38	35	3	2.85714	162.857	35	3
MG02-59	229.384	0.473934	0.03833	0.01558	0.0276	0.01221	0.00522	0.00021	0.9	-389	620	28	12	34	1	17.6471	1244.12	34	1
MG02-60	498.153	0.497512	0.026	0.00668	0.01705	0.00483	0.00475	0.00014	0.9	-465	290	17	5	30.5	0.9	44.2623	1624.59	30.5	0.9
MG02-61	269.735	2.12766	0.18053	0.00549	0.21193	0.01162	0.00851	0.00026	0.9	2658	52	195	10	55	2	-254.545	-4732.73	55	2
MG02-62	114.443	1.17647	0.12354	0.02469	0.12566	0.0325	0.00738	0.0005	0.9	2008	387	120	29	47	3	-155.319	-4172.34	47	3
MG02-63	264.88	0.367647	0.00115	0.01358	0.00075	0.00888	0.00474	0.00016	0.9	-1928	981	1	9	30	1	96.6667	6526.67	30	1
MG02-64	853.146	1.31579	0.04441	0.00476	0.02125	0.00276	0.00347	9e-05	0.9	-49	206	21	3	22.3	0.6	5.8296	319.731	22.3	0.6
MG02-65	706.865	0.355872	0.0639	0.00562	0.04251	0.00462	0.00482	0.00012	0.86	738	193	42	4	31	0.8	-35.4839	-2280.65	31	0.8
MG02-66	31.0406	4.7619	0.46183	0.02432	0.70606	0.07779	0.01109	0.00086	0.9	4124	81	542	46	71	5	-663.38	-5708.45	71	5
MG02-67	100.518	0.383142	0.12032	0.0257	0.09001	0.0233	0.00543	0.00028	0.89	1961	422	88	22	35	2	-151.429	-5502.86	35	2
MG02-68	133.912	0.492611	0.03163	0.02323	0.02202	0.01711	0.00505	0.00024	0.9	-213	939	22	17	32	2	31.25	765.625	32	2
MG02-69	270.089	0.465116	0.03807	0.01189	0.02482	0.0085	0.00473	0.00016	0.9	-405	484	25	8	30	1	16.6667	1450	30	1
MG02-70	165.452	0.492611	0.08427	0.01905	0.0604	0.01611	0.0052	0.00024	0.9	1299	482	60	15	33	2	-81.8182	-3836.36	33	2
MG02-71	79.7777	0.341297	0.06852	0.03537	0.05148	0.02959	0.00545	0.00036	0.9	884	1021	51	29	35	2	-45.7143	-2425.71	35	2
MG02-72	172.696	0.413223	0.00466	0.02888	0.00216	0.01349	0.00337	0.00018	0.9	-1679	1267	2	14	22	1	90.9091	7731.82	22	1
MG02-73	111.327	0.340136	0.04408	0.04985	0.0182	0.02194	0.00299	0.00025	0.9	-66	1334	18	22	19	2	5.26316	447.368	19	2
MG02-74	390.668	0.8	0.02401	0.01005	0.01416	0.00631	0.00428	0.00013	0.9	-560	452	14	6	27.5	0.8	49.0909	2136.36	27.5	0.8
MG02-75	320.839	0.318471	0.07209	0.00806	0.06746	0.00945	0.00679	0.00022	0.9	988	238	66	9	44	1	-50	-2145.45	44	1
MG02-77	72.96	0.271739	0.05192	0.04748	0.04442	0.04406	0.00621	0.00054	0.9	282	1248	44	43	40	3	-10	-605	40	3
MG02-78	90.8841	0.497512	0.1639	0.03654	0.1	0.02875	0.00443	0.00033	0.9	2496	421	97	27	28	2	-246.429	-8814.29	28	2
MG02-79	63.7251	0.219298	0.05135	0.036	0.05214	0.03958	0.00736	0.00048	0.9	257	1102	52	38	47	3	-10.6383	-446.809	47	3
MG02-80	83.2101	0.242131	0.05223	0.03266	0.05166	0.03532	0.00717	0.00047	0.9	295	1044	51	34	46	3	-10.8696	-541.304	46	3
MG02-81	97.32	0.543478	0.04611	0.04363	0.0253	0.02564	0.00398	0.0003	0.9	3	1222	25	25	26	2	3.84615	88.4615	26	2
MG02-82	185.044	0.398406	0.01013	0.01938	0.00695	0.01356	0.00497	0.00021	0.9	-1321	919	7	14	32	1	78.125	4228.12	32	1
MG02-83	767.369	0.581395	0.02805	0.00436	0.01884	0.00337	0.00487	0.00013	0.9	-371	185	19	3	31.3	0.8	39.2971	1285.3	31.3	0.8
MG02-84	301.965	0.403226	0.07878	0.00699	0.07216	0.00829	0.00664	0.0002	0.9	1167	182	71	8	43	1	-65.1163	-2613.95	43	1
MG02-85	456.175	0.534759	0.05629	0.00987	0.03645	0.00742	0.0047	0.00015	0.9	464	378	36	7	30.2	1	-19.2053	-1436.42	30.2	1
MG02-86	100.309	0.26178	0.10293	0.04971	0.06361	0.0361	0.00448	0.00043	0.9	1678	1065	63	34	29	3	-117.241	-5686.21	29	3
MG02-87	121.53	0.3861	0.02984	0.04183	0.02142	0.03146	0.00521	0.00039	0.9	-291	1207	22	31	33	3	33.3333	981.818	33	3
MG02-88	59.8291	0.324675	0.16827	0.06657	0.12614	0.0642	0.00544	0.00071	0.9	2541	931	121	58	35	5	-245.714	-7160	35	5
MG02-89	148.992	0.364964	0.04647	0.02308	0.04291	0.02314	0.0067	0.00032	0.9	22	814	43	23	43	2	0	48.8372	43	2
MG02-90	2295.43	1.92308	0.049	0.00269	0.02714	0.00207	0.00402	0.0001	0.9	148	127	27	2	25.9	0.6	-4.2471	-471.429	25.9	0.6
MG02-91	129.032	0.384615	0.08521	0.03918	0.05233	0.02736	0.00445	0.00033	0.87	1320	930	52	26	29	2	-79.3103	-4451.72	29	2
MG02-92	2571.62	0.364964	0.03782	0.00195	0.01973	0.00146	0.00378	0.0001	0.9	-420	236	20	1	24.3	0.6	17.6955	1828.4	24.3	0.6
MG02-93	294.792	0.480769	0.0614	0.01416	0.04344	0.01144	0.00513	0.00019	0.9	653	486	43	11	33	1	-30.303	-1878.79	33	1
MG02-94	654.336	0.806452	0.06689	0.00688	0.0613	0.00791	0.00665	0.0002	0.9	834	223	60	8	43	1	-39.5349	-1839.53	43	1
MG02-95	288.746	0.584795	0.07	0.01646	0.04322	0.0117	0.00448	0.00018	0.9	928	503	43	11	29	1	-48.2759	-3100	29	1
MG02-96	91.6742	0.288184	0.09073	0.04603	0.06432	0.03739	0.00514	0.00043	0.9	1441	1102	63	36	33	3	-90.9091	-4266.67	33	3
MG02-97	28.5633	0.289855	0.04515	0.12303	0.03223	0.09333	0.00518	0.00099	0.9	-12	2749	32	92	33	6	3.0303	136.364	33	6
MG02-98	221.533	0.492611	0.04633	0.01277	0.04306	0.01317	0.00674	0.00023	0.9	15	465	43	13	43	1	0	65.1163	43	1
MG02-99	321.231	0.520833	0.04908	0.01175	0.03151	0.0085	0.00466	0.00016	0.9	152	433	32	8	30	1	-6.66667	-406.667	30	1
MG02-100	80.4164	0.44843	0.05344	0.03111	0.05434	0.03446	0.00737	0.00043	0.9	348	1002	54	33	47	3	-14.8936	-640.426	47	3
MG02-101	166.052	0.42735	0.06952	0.03365	0.03451	0.01883	0.0036	0.00025	0.9	914	957	34	18	23	2	-47.8261	-3873.91	23	2
MG02-102	484.537	0.574713	0.08007	0.01673	0.02448	0.00599	0.00222	9e-05	0.9	1199	445	25	6	14.3	0.6	-74.8252	-8284.62	14.3	0.6
MG02-103	198.49	0.526316	0.04273	0.03814	0.01428	0.01364	0.00242	0.00017	0.9	-137	1104	14	14	16	1	12.5	956.25	16	1
MG02-104	137.539	0.431034	0.04361	0.02709	0.02924	0.01956	0.00486	0.00026	0.9	-91	931	29	19	31	2	6.45161	393.548	31	2
MG02-105	272.452	0.383142	0.05049	0.01763	0.03196	0.01246	0.00459	0.00021	0.9	218	617	32	12	30	1	-6.66667	-626.667	30	1
MG02-106	220.685	0.228311	0.06108	0.05049	0.0177	0.01613	0.0021	0.0002	0.9	642	1220	18	16	14	1	-28.5714	-4485.71	14	1
MG02-107	1623.3	0.454545	0.03838	0.00213	0.02463	0.00191	0.00466	0.00012	0.9	-386	189	25	2	30	0.8	16.6667	1386.67	30	0.8
MG02-108	2045.25	0.145138	0.05029	0.00138	0.03947	0.00187	0.00569	0.00014	0.9	208	66	39	2	36.6	0.9	-6.55738	-468.306	36.6	0.9
MG02-109	76.3423	0.4	0.14105	0.04703	0.08801	0.03614	0.00453	0.0004	0.9	2240	719	86	34	29	3	-196.552	-7624.14	29	3
MG02-111	485.762	0.662252	0.05898	0.00795	0.03931	0.00609	0.00483	0.00011	0.9	566	305	39	6	31.1	0.7	-25.4019	-1719.94	31.1	0.7
MG02-112	111.542	0.346021	0.04546	0.03405	0.03322	0.02662	0.0053	0.00031	0.9	-31	1073	33	26	34	2	2.94118	191.176	34	2
MG02-113	130.015	0.35461	0.0484	0.02223	0.04235	0.021	0.00635	0.00026	0.9	119	796	42	20	41	2	-2.43902	-190.244	41	2
MG02-114	201.801	0.666667	0.04721	0.02785	0.02376	0.01512	0.00365	0.00019	0.9	60	940	24	15	23	1	-4.34783	-160.87	23	1
MG02-116	106.129	0.632911	0.04255	0.02657	0.03772	0.02518	0.00643	0.00031	0.9	-147	925	38	25	41	2	7.31707	458.537	41	2
MG02-115	284.129	0.396825	0.04499	0.00976	0.04081	0.00968	0.00658	0.00015	0.9	-20	364	41	9	42.3	1	3.07329	147.281	42.3	1
MG02-117	115.902	0.454545	0.08898	0.03376	0.07523	0.03288	0.00613	0.0004	0.9	1404	831	74	31	39	3	-89.7436	-3500	39	3
MG02-118	1230.22	2.7027	0.04609	0.00607	0.02413	0.00338	0.0038	5e-05	0.66	2	247	24	3	24.4	0.3	1.63934	91.8033	24.4	0.3
MG02-119	606.222	1.02041	0.04202	0.00927	0.02179	0.00527	0.00376	9e-05	0.9	-176	348	22	5	24.2	0.6	9.09091	827.273	24.2	0.6
MG02-120	157.127	0.34965	0.08021	0.01728	0.07061	0.01737	0.00638	0.00022	0.9	1202	461	69	16	41	1	-68.2927	-2831.71	41	1
Ages assumed < 0.5 Ma
MG02-29	102.952	0.222041
MG02-30	56.9179	0.482132
MG02-47	620.788	0.768488
MG02-48	261.377	0.733943
MG02-51	233.743	0.604016
MG02-53	523.925	0.553699
MG02-76	83.5952	0.601903
MG02-110	358.541	0.450127

## Sheet: IL-01
Supplementary Table A.1 U-Pb ages of detrital zircons from every sample
Spot	U(ppm)	Th/U	U-Th-Pb ratios							Ages (Ma)						Discordance		Inferred Age (Ma)	1σ
			207Pb/206Pb	1σ	207Pb/235U	1σ	206Pb/238U	1σ	pr	207Pb/206Pb	1σ	207Pb/235U	1σ	206Pb/238U	1σ	<1000 Ma	>1000 Ma
IL01-01	679.723	1.36986	0.04264	0.00243	0.02716	0.00215	0.00462	0.00012	0.9	-142	124	27	2	29.7	0.8	9.09091	578.114	29.7	0.8
IL01-02	244.534	0.333333	0.04476	0.00593	0.03148	0.00504	0.0051	0.00016	0.9	-32	231	31	5	33	1	6.06061	196.97	33	1
IL01-03	35.0817	0.197239	0.09889	0.05099	0.05898	0.03581	0.00433	0.00045	0.9	1603	1177	58	34	28	3	-107.143	-5625	28	3
IL01-04	47.9556	0.187266	0.0808	0.04068	0.05613	0.03278	0.00504	0.00046	0.9	1217	1130	55	32	32	3	-71.875	-3703.12	32	3
IL01-05	305.494	0.588235	0.04605	0.00635	0.04188	0.00716	0.0066	0.00025	0.9		246	42	7	42	2	0	100	42	2
IL01-06	75.2989	0.581395	0.05374	0.00751	0.09953	0.01678	0.01343	0.00044	0.9	360	306	96	15	86	3	-11.6279	-318.605	86	3
IL01-07	92.5758	0.326797	0.03641	0.01856	0.02349	0.01296	0.00468	0.00022	0.9	-17	748	24	13	30	1	20	156.667	30	1
IL01-08	72.2123	0.200401	0.0396	0.0258	0.02563	0.01806	0.00469	0.00028	0.9	-313	913	26	18	30	2	13.3333	1143.33	30	2
IL01-09	934.59	0.134409	0.04849	0.00168	0.03193	0.00177	0.00478	0.00012	0.9	123	79	32	2	30.7	0.8	-4.23453	-300.651	30.7	0.8
IL01-10	101.281	0.247525	0.04735	0.01722	0.03187	0.01304	0.00488	0.00025	0.9	67	618	32	13	31	2	-3.22581	-116.129	31	2
IL01-11	1477.61	0.0956023	0.04659	0.00269	0.03059	0.00235	0.00476	0.00014	0.77	28	121	31	2	30.6	0.9	-1.30719	8.49673	30.6	0.9
IL01-12	81.3395	0.273224	0.10434	0.02952	0.05683	0.02022	0.00395	0.00033	0.9	1703	631	56	19	25	2	-124	-6712	25	2
IL01-13	134.518	1.92308	0.04625	0.00911	0.33902	0.07347	0.05316	0.00158	0.7	11	325	296	56	334	10	11.3772	96.7066	334	10
IL01-14	79.2275	0.285714	0.09202	0.02133	0.0528	0.0148	0.00416	0.00023	0.9	1468	503	52	14	27	1	-92.5926	-5337.04	27	1
IL01-15	20.2456	0.180832	0.03803	0.06382	0.03325	0.05908	0.00634	0.0007	0.9	-407	1594	33	58	41	4	19.5122	1092.68	41	4
IL01-16	50.5526	0.120337	0.02373	0.02749	0.01928	0.02336	0.00589	0.00035	0.9	-573	948	19	23	38	2	50	1607.89	38	2
IL01-17	222.91	0.520833	0.05509	0.00693	0.03684	0.0057	0.00485	0.00016	0.9	416	282	37	6	31	1	-19.3548	-1241.94	31	1
IL01-18	31.4769	0.334448	0.12041	0.03276	0.41005	0.13307	0.0247	0.00152	0.88	1962	594	349	96	157	10	-122.293	-1149.68	157	10
IL01-19	66.3915	0.31746	0.05561	0.02312	0.03748	0.01735	0.00489	0.00026	0.9	437	803	37	17	31	2	-19.3548	-1309.68	31	2
IL01-20	354.909	0.413223	0.04479	0.00406	0.03045	0.00351	0.00493	0.00014	0.9	-30	174	30	3	31.7	0.9	5.36278	194.637	31.7	0.9
IL01-21	107.473	0.262467	0.05769	0.01314	0.03951	0.0104	0.00497	0.0002	0.9	518	446	39	10	32	1	-21.875	-1518.75	32	1
IL01-22	74.5478	0.21692	0.06432	0.02223	0.03901	0.01529	0.0044	0.00023	0.9	752	708	39	15	28	1	-39.2857	-2585.71	28	1
IL01-23	135.29	0.326797	0.04985	0.00938	0.04021	0.00878	0.00585	0.0002	0.9	188	348	40	9	38	1	-5.26316	-394.737	38	1
IL01-24	173.019	0.257069	0.03308	0.0091	0.02269	0.00693	0.00497	0.00017	0.9	-152	340	23	7	32	1	28.125	575	32	1
IL01-25	267.674	0.318471	0.05464	0.00514	0.03812	0.00457	0.00506	0.00015	0.9	398	214	38	4	32.5	1	-16.9231	-1124.62	32.5	1
IL01-26	118.602	0.250627	0.05406	0.01486	0.03488	0.01104	0.00468	0.00022	0.9	374	512	35	11	30	1	-16.6667	-1146.67	30	1
IL01-27	78.8305	0.223714	0.05667	0.01837	0.04003	0.01464	0.00512	0.00024	0.9	479	605	40	14	33	2	-21.2121	-1351.52	33	2
IL01-28	627.433	0.621118	0.04792	0.00223	0.03351	0.00229	0.00507	0.00013	0.9	95	102	33	2	32.6	0.8	-1.22699	-191.411	32.6	0.8
IL01-29	155.633	0.390625	0.03824	0.00913	0.02841	0.00767	0.00539	0.00019	0.9	-395	359	28	8	35	1	20	1228.57	35	1
IL01-30	146.898	0.371747	0.05525	0.01188	0.03256	0.00814	0.00428	0.00017	0.9	422	430	33	8	28	1	-17.8571	-1407.14	28	1
IL01-31	77.1871	0.322581	0.03815	0.02238	0.02444	0.01551	0.00465	0.00025	0.9	-400	811	25	15	30	2	16.6667	1433.33	30	2
IL01-32	144.986	0.529101	0.1708	0.00749	0.16796	0.01238	0.00713	0.00026	0.9	2565	73	158	11	46	2	-243.478	-5476.09	46	2
IL01-33	301.843	0.369004	0.05194	0.00561	0.02995	0.00405	0.00418	0.00013	0.9	283	235	30	4	26.9	0.8	-11.5242	-952.045	26.9	0.8
IL01-34	39.7599	0.215517	0.09813	0.03437	0.06849	0.02863	0.00506	0.00039	0.9	1589	768	67	27	33	3	-103.03	-4715.15	33	3
IL01-35	45.4862	0.186916	0.0791	0.03155	0.05673	0.026	0.0052	0.00035	0.9	1175	867	56	25	33	2	-69.697	-3460.61	33	2
IL01-36	71.6113	0.220751	0.09008	0.01759	0.07973	0.01924	0.00642	0.00033	0.91	1427	407	78	18	41	2	-90.2439	-3380.49	41	2
IL01-37	99.2081	0.21978	0.09786	0.02524	0.05042	0.01607	0.00374	0.00026	0.9	1584	535	50	16	24	2	-108.333	-6500	24	2
IL01-38	46.3236	0.140056	0.048	0.03824	0.03617	0.03147	0.00546	0.00045	0.9	99	1136	36	31	35	3	-2.85714	-182.857	35	3
IL01-39	87.0942	0.289017	0.08587	0.02014	0.05834	0.01659	0.00493	0.00028	0.9	1335	490	58	16	32	2	-81.25	-4071.88	32	2
IL01-40	435.66	0.458716	0.04365	0.00361	0.02857	0.00304	0.00475	0.00013	0.9	-89	167	29	3	30.5	0.8	4.91803	391.803	30.5	0.8
IL01-41	350.782	0.383142	0.04799	0.00398	0.03254	0.0035	0.00492	0.00014	0.9	99	179	33	3	31.6	0.9	-4.43038	-213.291	31.6	0.9
IL01-42	181.345	0.243902	0.05196	0.00806	0.03584	0.00663	0.005	0.00017	0.9	284	324	36	6	32	1	-12.5	-787.5	32	1
IL01-43	85.3981	0.301205	0.05058	0.02191	0.02957	0.01417	0.00424	0.00022	0.9	222	732	30	14	27	1	-11.1111	-722.222	27	1
IL01-44	188.401	0.296736	0.0461	0.00652	0.03197	0.00527	0.00503	0.00017	0.75	3	251	32	5	32	1	0	90.625	32	1
IL01-45	250.832	0.322581	0.04392	0.00711	0.02552	0.00488	0.00421	0.00014	0.9	-75	265	26	5	27.1	0.9	4.05904	376.753	27.1	0.9
IL01-46	48.409	0.194553	0.05111	0.03751	0.03887	0.03153	0.00552	0.00048	0.9	246	1116	39	31	35	3	-11.4286	-602.857	35	3
IL01-47	83.8311	0.458716	0.02302	0.02929	0.01474	0.01969	0.00464	0.00033	0.9	-608	1049	15	20	30	2	50	2126.67	30	2
IL01-48	88.7152	0.283286	0.07056	0.01683	0.04986	0.01403	0.00513	0.00025	0.9	945	500	49	14	33	2	-48.4848	-2763.64	33	2
IL01-49	41.1717	0.159236	0.08335	0.03342	0.07098	0.03372	0.00618	0.00054	0.88	1278	836	70	32	40	3	-75	-3095	40	3
IL01-50	276.321	0.330033	0.0526	0.00549	0.03686	0.0048	0.00508	0.00015	0.9	312	233	37	5	32.7	1	-13.1498	-854.128	32.7	1
IL01-51	68.8872	0.244499	0.07978	0.02454	0.05269	0.01902	0.00479	0.00029	0.9	1192	656	52	18	31	2	-67.7419	-3745.16	31	2
IL01-52	80.6062	0.258398	0.05101	0.02087	0.03734	0.01709	0.00531	0.00029	0.9	241	687	37	17	34	2	-8.82353	-608.824	34	2
IL01-53	68.9876	0.171233	0.05077	0.02927	0.03308	0.02106	0.00473	0.00032	0.9	230	946	33	21	30	2	-10	-666.667	30	2
IL01-54	151.399	0.156006	0.05969	0.00767	0.05523	0.00868	0.00671	0.00022	0.9	592	283	55	8	43	1	-27.907	-1276.74	43	1
IL01-55	78.423	0.283286	0.02738	0.02574	0.01588	0.01574	0.00421	0.00024	0.9	-401	975	16	16	27	2	40.7407	1585.19	27	2
IL01-56	170.02	0.4	0.05069	0.01163	0.03534	0.0094	0.00506	0.00021	0.9	227	419	35	9	33	1	-6.06061	-587.879	33	1
IL01-57	133.393	0.242131	0.05821	0.01238	0.0387	0.00958	0.00482	0.00019	0.9	538	439	39	9	31	1	-25.8065	-1635.48	31	1
IL01-58	208.318	0.30303	0.06238	0.00698	0.04947	0.007	0.00575	0.00019	0.91	687	244	49	7	37	1	-32.4324	-1756.76	37	1
IL01-59	319.817	0.230947	0.06081	0.00658	0.03853	0.00534	0.0046	0.00016	0.91	632	237	38	5	30	1	-26.6667	-2006.67	30	1
IL01-60	57.2995	0.221239	0.04782	0.03712	0.0254	0.02142	0.00385	0.00029	0.9	90	1098	25	21	25	2	0	-260	25	2
IL01-61	167.196	0.105374	0.06701	0.01081	0.04826	0.00963	0.00522	0.00023	0.9	838	352	48	9	34	1	-41.1765	-2364.71	34	1
IL01-62	111.226	0.309598	0.06615	0.01738	0.03863	0.01184	0.00424	0.00021	0.9	811	545	38	12	27	1	-40.7407	-2903.7	27	1
IL01-63	147.8	0.238663	0.04113	0.00886	0.03416	0.00841	0.00602	0.00021	0.9	-225	304	34	8	39	1	12.8205	676.923	39	1
IL01-64	107.17	0.387597	0.05999	0.01308	0.03956	0.01008	0.00478	0.0002	0.88	603	450	39	10	31	1	-25.8065	-1845.16	31	1
IL01-65	118.631	0.323625	0.04329	0.01512	0.02731	0.01055	0.00457	0.00019	0.9	-108	510	27	10	29	1	6.89655	472.414	29	1
IL01-66	74.6845	0.206186	0.09501	0.02307	0.07824	0.02358	0.00597	0.0004	0.9	1528	500	76	22	38	3	-100	-3921.05	38	3
IL01-67	191.107	0.185874	0.07446	0.00909	0.05375	0.00835	0.00524	0.0002	0.9	1054	251	53	8	34	1	-55.8824	-3000	34	1
IL01-68	109.49	0.343643	0.05393	0.0166	0.03147	0.01094	0.00423	0.00019	0.9	368	561	31	11	27	1	-14.8148	-1262.96	27	1
IL01-69	982.959	0.588235	0.0403	0.00156	0.02636	0.00158	0.00474	0.00012	0.9	-272	89	26	2	30.5	0.8	14.7541	991.803	30.5	0.8
IL01-70	147.819	0.200401	0.06091	0.01828	0.0371	0.01306	0.00442	0.00026	0.9	636	599	37	13	28	2	-32.1429	-2171.43	28	2
IL01-71	214.183	0.227273	0.04955	0.00802	0.0337	0.00648	0.00493	0.00017	0.9	174	315	34	6	32	1	-6.25	-443.75	32	1
IL01-72	206.866	0.344828	0.04854	0.00727	0.03477	0.00621	0.0052	0.00017	0.9	126	290	35	6	33	1	-6.06061	-281.818	33	1
IL01-73	155.135	0.3003	0.06764	0.00958	0.04865	0.00844	0.00522	0.00019	0.9	858	302	48	8	34	1	-41.1765	-2423.53	34	1
IL01-74	387.068	0.440529	0.0547	0.00476	0.03322	0.00374	0.00441	0.00013	0.9	400	194	33	4	28.4	0.8	-16.1972	-1308.45	28.4	0.8
IL01-75	44.915	0.234192	0.04669	0.03345	0.03322	0.02581	0.00516	0.00035	0.9	33	1064	33	25	33	2	0	0	33	2
IL01-76	58.0517	0.114943	0.07291	0.02648	0.05985	0.02537	0.00595	0.00041	0.9	1011	767	59	24	38	3	-55.2632	-2560.53	38	3
IL01-77	217.951	0.0645995	0.08153	0.01473	0.05679	0.01251	0.00505	0.00024	0.88	1234	380	56	12	32	2	-75	-3756.25	32	2
IL01-78	114.861	0.269542	0.05932	0.01259	0.04286	0.01061	0.00524	0.00021	0.9	579	445	43	10	34	1	-26.4706	-1602.94	34	1
IL01-79	216.745	0.19685	0.05376	0.00773	0.0404	0.00711	0.00545	0.0002	0.9	361	309	40	7	35	1	-14.2857	-931.429	35	1
IL01-80	79.7275	0.211864	0.05892	0.01752	0.04256	0.01438	0.00524	0.00024	0.9	564	584	42	14	34	2	-23.5294	-1558.82	34	2
IL01-81	83.41	0.175747	0.04906	0.02117	0.03872	0.01869	0.00572	0.00033	0.9	151	713	39	18	37	2	-5.40541	-308.108	37	2
IL01-82	236.742	0.314465	0.04641	0.00606	0.0335	0.00527	0.00524	0.00016	0.9	19	249	33	5	34	1	2.94118	44.1176	34	1
IL01-83	85.3326	0.30581	0.06287	0.02379	0.03501	0.01509	0.00404	0.00024	0.9	704	742	35	15	26	2	-34.6154	-2607.69	26	2
IL01-84	735.612	0.458716	0.04551	0.00144	0.04237	0.00222	0.00675	0.00017	0.9	-28	61	42	2	43	1	2.32558	165.116	43	1
IL01-85	59.0212	0.13587	0.04823	0.02712	0.03267	0.02009	0.00491	0.00029	0.9	111	888	33	20	32	2	-3.125	-246.875	32	2
IL01-86	105.493	0.2457	0.05741	0.01382	0.04205	0.01166	0.00531	0.00022	0.9	507	479	42	11	34	1	-23.5294	-1391.18	34	1
IL01-87	35.9253	0.121655	0.05058	0.04929	0.03279	0.03475	0.0047	0.00045	0.9	222	1356	33	34	30	3	-10	-640	30	3
IL01-88	320.114	0.925926	0.05437	0.00471	0.04134	0.00462	0.00552	0.00016	0.9	386	193	41	5	35	1	-17.1429	-1002.86	35	1
IL01-89	131.388	0.257069	0.04451	0.01181	0.03253	0.00977	0.0053	0.00021	0.9	-44	392	33	10	34	1	2.94118	229.412	34	1
IL01-90	51.0572	0.18018	0.04218	0.03123	0.03027	0.02428	0.0052	0.00036	0.9	-167	1018	30	24	33	2	9.09091	606.061	33	2
IL01-91	429.381	0.502513	0.04348	0.00318	0.03327	0.00321	0.00555	0.00015	0.9	-98	149	33	3	35.7	1	7.56303	374.51	35.7	1
IL01-92	228.879	0.276243	0.06099	0.00632	0.04437	0.00584	0.00528	0.00017	0.9	639	225	44	6	34	1	-29.4118	-1779.41	34	1
IL01-93	97.8263	0.213675	0.0517	0.01495	0.03896	0.01272	0.00547	0.00023	0.9	272	513	39	12	35	1	-11.4286	-677.143	35	1
IL01-94	179.792	0.290698	0.04418	0.00839	0.03172	0.00699	0.00521	0.00018	0.9	-61	295	32	7	33	1	3.0303	284.848	33	1
IL01-95	145.543	0.230947	0.05548	0.00924	0.0441	0.00872	0.00577	0.00021	0.87	431	345	44	8	37	1	-18.9189	-1064.86	37	1
IL01-96	152.396	0.238663	0.0325	0.00935	0.02619	0.00833	0.00585	0.0002	0.9	-177	344	26	8	38	1	31.5789	565.789	38	1
IL01-97	338.725	0.333333	0.05643	0.0045	0.03905	0.00412	0.00502	0.00015	0.9	469	176	39	4	32.3	1	-20.743	-1352.01	32.3	1
IL01-98	42.8398	0.201613	0.04796	0.02911	0.04909	0.03274	0.00742	0.0005	0.9	97	944	49	32	48	3	-2.08333	-102.083	48	3
IL01-99	857.546	0.621118	0.04695	0.0017	0.03262	0.00188	0.00504	0.00013	0.9	47	76	33	2	32.4	0.8	-1.85185	-45.0617	32.4	0.8
IL01-100	106.167	0.408163	0.05205	0.01293	0.03879	0.01103	0.00541	0.00022	0.9	288	459	39	11	35	1	-11.4286	-722.857	35	1
IL01-101	60.8213	0.323625	0.06399	0.02992	0.04192	0.02218	0.00475	0.00033	0.9	741	899	42	22	31	2	-35.4839	-2290.32	31	2
IL01-102	368.936	0.568182	0.04279	0.00451	0.02712	0.00353	0.0046	0.00013	0.9	-134	191	27	3	29.6	0.8	8.78378	552.703	29.6	0.8
IL01-103	365.944	0.371747	0.04511	0.00405	0.03052	0.0035	0.00491	0.00014	0.9	-14	184	31	3	31.6	0.9	1.89873	144.304	31.6	0.9
IL01-104	193.271	0.288184	0.06271	0.00796	0.04207	0.00655	0.00487	0.00016	0.9	698	275	42	6	31	1	-35.4839	-2151.61	31	1
IL01-105	73.5686	0.112994	0.19687	0.02206	0.15447	0.02663	0.00569	0.00041	0.9	2800	185	146	23	37	3	-294.595	-7467.57	37	3
IL01-106	57.6983	0.282486	0.08295	0.02826	0.05362	0.02129	0.00469	0.0003	0.9	1268	727	53	21	30	2	-76.6667	-4126.67	30	2
IL01-107	99.172	0.371747	0.05715	0.01607	0.03937	0.01282	0.005	0.00027	0.86	497	522	39	13	32	2	-21.875	-1453.12	32	2
IL01-108	41.8571	0.215054	0.01003	0.03662	0.00791	0.02938	0.00572	0.0004	0.9	-1327	1185	8	30	37	3	78.3784	3686.49	37	3

## Sheet: CY-05
Supplementary Table A.1 U-Pb ages of detrital zircons from every sample
Spot	U(ppm)	Th/U	U-Th-Pb ratios							Ages (Ma)						Discordance		Inferred Age (Ma)	1σ
			207Pb/206Pb	1σ	207Pb/235U	1σ	206Pb/238U	1σ	pr	207Pb/206Pb	1σ	207Pb/235U	1σ	206Pb/238U	1σ	<1000 Ma	>1000 Ma
CY05-01	251.97	0.613497	0.0792	0.00607	0.04694	0.00473	0.0043	0.00012	0.9	1177	130	47	5	27.7	0.8	-69.6751	-4149.1	27.7	0.8
CY05-02	150.071	0.367647	0.04978	0.01191	0.03054	0.00834	0.00445	0.00017	0.9	185	369	31	8	29	1	-6.89655	-537.931	29	1
CY05-03	44.1529	0.250627	0.05848	0.04443	0.03447	0.02891	0.00428	0.00038	0.9	548	1078	34	28	28	2	-21.4286	-1857.14	28	2
CY05-04	61.0126	0.22779	0.13449	0.0277	0.08519	0.0227	0.00459	0.00032	0.9	2157	322	83	21	30	2	-176.667	-7090	30	2
CY05-05	329.459	0.555556	0.03693	0.0042	0.02621	0.00356	0.00515	0.00013	0.9	-476	291	26	4	33.1	0.8	21.4502	1538.07	33.1	0.8
CY05-06	207.126	0.471698	0.0496	0.00742	0.04027	0.00717	0.00589	0.00019	0.9	176	262	40	7	38	1	-5.26316	-363.158	38	1
CY05-07	177.23	0.358423	0.0617	0.00807	0.0418	0.00659	0.00491	0.00015	0.9	664	244	42	6	31.6	1	-32.9114	-2001.27	31.6	1
CY05-08	113.688	0.248139	0.01189	0.02247	0.00713	0.01384	0.00435	0.00025	0.9	-1214	874	7	14	28	2	75	4435.71	28	2
CY05-09	283.012	0.421941	0.04173	0.00422	0.03368	0.00416	0.00585	0.00015	0.9	-192	158	34	4	37.6	1	9.57447	610.638	37.6	1
CY05-10	246.816	0.265252	0.07991	0.00451	0.06948	0.00552	0.00631	0.00017	0.9	1195	95	68	5	41	1	-65.8537	-2814.63	41	1
CY05-11	755.331	0.37594	0.05491	0.0027	0.34452	0.0217	0.0455	0.00102	0.72	409	94	301	16	287	6	-4.87805	-42.5087	287	6
CY05-12	378.055	0.46729	0.03914	0.00295	0.03325	0.00321	0.00616	0.00015	0.9	-340	171	33	3	39.6	1	16.6667	958.586	39.6	1
CY05-13	129.129	0.337838	0.0573	0.00805	0.05142	0.00861	0.00651	0.0002	0.9	503	266	51	8	42	1	-21.4286	-1097.62	42	1
CY05-14	278.622	0.473934	0.05343	0.00161	0.11726	0.00578	0.01592	0.00037	0.9	347	58	113	5	102	2	-10.7843	-240.196	102	2
CY05-15	68.9406	0.242131	0.04773	0.01804	0.03727	0.01555	0.00566	0.00025	0.9	86	520	37	15	36	2	-2.77778	-138.889	36	2
CY05-16	120.644	0.307692	0.06717	0.01472	0.04256	0.0109	0.0046	0.00021	0.86	843	401	42	11	30	1	-40	-2710	30	1
CY05-17	84.2398	0.268817	0.06315	0.01638	0.04496	0.01336	0.00516	0.00022	0.9	713	456	45	13	33	1	-36.3636	-2060.61	33	1
CY05-18	253.275	0.260417	0.03998	0.00447	0.03455	0.00464	0.00627	0.00016	0.9	-291	184	34	5	40	1	15	827.5	40	1
CY05-19	434.742	0.276243	0.05556	0.00177	0.39453	0.01896	0.0515	0.00119	0.82	435	60	338	14	324	7	-4.32099	-34.2593	324	7
CY05-20	248.933	0.26455	0.06031	0.00683	0.04468	0.00624	0.00537	0.00017	0.86	615	212	44	6	35	1	-25.7143	-1657.14	35	1
CY05-21	220.055	0.5	0.05315	0.00608	0.04556	0.00643	0.00622	0.00019	0.9	335	218	45	6	40	1	-12.5	-737.5	40	1
CY05-22	164.086	0.381679	0.03173	0.00849	0.02304	0.00679	0.00527	0.00016	0.9	-209	262	23	7	34	1	32.3529	714.706	34	1
CY05-23	588.832	0.106496	0.04608	0.00179	0.03202	0.00174	0.00504	0.00012	0.77	2	64	32	2	32.4	0.8	1.23457	93.8272	32.4	0.8
CY05-24	164.405	0.220264	0.06229	0.01165	0.0471	0.01036	0.00548	0.00022	0.84	684	343	47	10	35	1	-34.2857	-1854.29	35	1
CY05-25	214.672	0.383142	0.04698	0.0069	0.03273	0.00566	0.00505	0.00015	0.9	48	243	33	6	32.5	1	-1.53846	-47.6923	32.5	1
CY05-26	105.882	0.205761	0.04941	0.01307	0.03404	0.01	0.005	0.0002	0.75	168	382	34	10	32	1	-6.25	-425	32	1
CY05-27	150.481	0.277008	0.08422	0.00931	0.0754	0.01085	0.00649	0.00025	0.9	1298	185	74	10	42	2	-76.1905	-2990.48	42	2
CY05-28	141.511	0.204918	0.05639	0.01069	0.04002	0.00882	0.00515	0.00018	0.9	468	351	40	9	33	1	-21.2121	-1318.18	33	1
CY05-29	322.102	0.348432	0.06406	0.00383	0.05764	0.00481	0.00653	0.00018	0.9	744	108	57	5	42	1	-35.7143	-1671.43	42	1
CY05-30	247.11	0.33557	0.04832	0.00477	0.04163	0.0051	0.00625	0.00017	0.9	115	184	41	5	40	1	-2.5	-187.5	40	1
CY05-31	143.279	0.363636	0.04607	0.00613	0.02818	0.00432	0.00444	0.00015	0.68	2	213	28	4	28.5	0.9	1.75439	92.9825	28.5	0.9
CY05-32	1002.59	0.0765697	0.04612	0.00113	0.03338	0.00131	0.00525	0.00012	0.82	4	39	33	1	33.7	0.8	2.07715	88.1306	33.7	0.8
CY05-33	166.478	0.257069	0.06578	0.00873	0.05706	0.0094	0.00629	0.00023	0.9	799	242	56	9	40	1	-40	-1897.5	40	1
CY05-34	104.769	0.258398	0.0561	0.01426	0.03845	0.01114	0.00497	0.0002	0.9	456	430	38	11	32	1	-18.75	-1325	32	1
CY05-35	225.069	0.261097	0.05012	0.00492	0.04867	0.00593	0.00704	0.00019	0.9	201	187	48	6	45	1	-6.66667	-346.667	45	1
CY05-36	59.9949	0.228311	0.05582	0.01692	0.05788	0.0198	0.00752	0.00033	0.9	445	490	57	19	48	2	-18.75	-827.083	48	2
CY05-37	55.2233	0.243309	0.05481	0.02698	0.03652	0.01979	0.00483	0.00027	0.9	404	750	36	19	31	2	-16.129	-1203.23	31	2
CY05-38	460.804	0.229885	0.04325	0.00211	0.04087	0.00286	0.00685	0.00017	0.9	-110	90	41	3	44	1	6.81818	350	44	1
CY05-39	492.341	0.198413	0.0507	0.00424	0.04363	0.00438	0.00624	0.00016	0.73	227	159	43	4	40	1	-7.5	-467.5	40	1
CY05-40	711.95	0.121507	0.04617	0.00432	0.03841	0.00406	0.00603	0.00015	0.58	7	166	38	4	38.8	1	2.06186	81.9588	38.8	1
CY05-41	148.878	0.18797	0.06945	0.0118	0.06159	0.01266	0.00643	0.00028	0.85	912	311	61	12	41	2	-48.7805	-2124.39	41	2
CY05-42	417.911	0.228311	0.0529	0.00507	0.03668	0.00425	0.00503	0.00014	0.77	324	182	37	4	32.3	0.9	-14.5511	-903.096	32.3	0.9
CY05-43	286.699	0.520833	0.04907	0.00701	0.028	0.00457	0.00414	0.00012	0.74	151	249	28	5	26.6	0.8	-5.26316	-467.669	26.6	0.8
CY05-44	262.654	0.323625	0.05211	0.0042	0.0448	0.00467	0.00624	0.00017	0.9	290	155	44	5	40	1	-10	-625	40	1
CY05-45	127.239	0.225225	0.06865	0.00975	0.05382	0.0093	0.00569	0.0002	0.9	888	257	53	9	37	1	-43.2432	-2300	37	1
CY05-46	55.5738	0.222222	0.07641	0.01995	0.06935	0.02099	0.00658	0.00031	0.9	1106	479	68	20	42	2	-61.9048	-2533.33	42	2
CY05-47	85.3089	0.213675	0.09063	0.02286	0.055	0.01662	0.0044	0.00025	0.9	1439	449	54	16	28	2	-92.8571	-5039.29	28	2
CY05-48	261.059	0.423729	0.03663	0.00426	0.0342	0.00478	0.00677	0.00018	0.9	-9	260	34	5	43	1	20.9302	120.93	43	1
CY05-49	582.192	2.32558	0.05524	0.00313	0.03418	0.00272	0.00449	0.00012	0.9	422	108	34	3	28.9	0.8	-17.6471	-1360.21	28.9	0.8
CY05-50	137.463	0.260417	0.05152	0.01207	0.03869	0.01038	0.00545	0.00021	0.9	264	385	39	10	35	1	-11.4286	-654.286	35	1
CY05-51	51.2297	0.183824	0.06022	0.02891	0.03584	0.01894	0.00432	0.00027	0.8	612	735	36	19	28	2	-28.5714	-2085.71	28	2
CY05-52	100.884	0.302115	0.06079	0.01201	0.05634	0.01298	0.00672	0.00025	0.9	632	369	56	12	43	2	-30.2326	-1369.77	43	2
CY05-53	278.428	0.353357	0.05645	0.00724	0.04237	0.00666	0.00544	0.00018	0.9	470	243	42	6	35	1	-20	-1242.86	35	1
CY05-54	449.313	0.3367	0.03529	0.00317	0.03117	0.00352	0.00641	0.00017	0.9	-62	203	31	3	41	1	24.3902	251.22	41	1
CY05-55	188.738	0.181159	0.05547	0.01079	0.0524	0.01155	0.00685	0.00025	0.76	431	344	52	11	44	2	-18.1818	-879.545	44	2
CY05-56	332.263	0.990099	0.05049	0.00129	0.13545	0.00611	0.01946	0.00047	0.9	218	50	129	5	124	3	-4.03226	-75.8065	124	3
CY05-57	917.48	0.854701	0.06095	0.00162	0.05313	0.0025	0.00632	0.00016	0.9	637	49	53	2	41	1	-29.2683	-1453.66	41	1
CY05-58	419.321	0.518135	0.09599	0.00397	0.09836	0.00649	0.00743	0.00022	0.9	1548	66	95	6	48	1	-97.9167	-3125	48	1
CY05-59	426.365	0.387597	0.04588	0.00282	0.0413	0.00346	0.00653	0.00017	0.9	-8	110	41	3	42	1	2.38095	119.048	42	1
CY05-60	275.868	0.395257	0.07638	0.03286	0.00939	0.0046	0.00089	6e-05	0.9	1105	781	9	5	5.7	0.4	-57.8947	-19286	5.7	0.4
CY05-61	356.297	0.552486	0.05755	0.01196	0.03688	0.00871	0.00465	0.00018	0.77	513	368	37	9	30	1	-23.3333	-1610	30	1
CY05-62	59.1095	0.224215	0.04683	0.02692	0.03295	0.02061	0.0051	0.00029	0.9	41	795	33	20	33	2	0	-24.2424	33	2
CY05-63	19.6996	0.26738	0.09194	0.1064	0.04748	0.06247	0.00374	0.00077	0.8	1466	1541	47	61	24	5	-95.8333	-6008.33	24	5
CY05-64	248.954	0.302115	0.08354	0.00512	0.06753	0.00581	0.00586	0.00017	0.9	1282	102	66	6	38	1	-73.6842	-3273.68	38	1
CY05-65	100.754	0.226244	0.0583	0.01574	0.04457	0.01374	0.00554	0.00024	0.9	541	460	44	13	36	2	-22.2222	-1402.78	36	2
CY05-66	40.0515	0.138696	0.04015	0.03674	0.03093	0.03023	0.00559	0.00039	0.9	-281	1033	31	30	36	3	13.8889	880.556	36	3
CY05-67	566.541	0.763359	0.04607	0.00079	0.0297	0.001	0.00468	0.00011	0.87	1	28	29.7	1	30.1	0.7	1.3289	96.6777	30.1	0.7
CY05-68	315.174	0.52356	0.04826	0.0036	0.0413	0.00406	0.00621	0.00017	0.9	112	139	41	4	40	1	-2.5	-180	40	1
CY05-69	51.9648	0.11534	0.10242	0.02899	0.07307	0.0249	0.00517	0.00034	0.9	1668	502	72	24	33	2	-118.182	-4954.55	33	2
CY05-70	37.8366	0.170068	0.08608	0.04282	0.0561	0.0322	0.00473	0.00041	0.9	1340	944	55	31	30	3	-83.3333	-4366.67	30	3
CY05-71	419.213	0.512821	0.05244	0.00255	0.04954	0.00351	0.00685	0.00018	0.9	305	94	49	3	44	1	-11.3636	-593.182	44	1
CY05-72	633.421	0.456621	0.07586	0.02064	0.07118	0.02167	0.00681	0.00028	0.81	1091	490	70	21	44	2	-59.0909	-2379.55	44	2
CY05-73	42.4515	0.34965	0.05933	0.03724	0.04286	0.02974	0.00524	0.00039	0.9	579	983	43	29	34	3	-26.4706	-1602.94	34	3
CY05-74	183.809	0.235294	0.04895	0.00862	0.03611	0.00737	0.00535	0.00017	0.9	145	289	36	7	34	1	-5.88235	-326.471	34	1
CY05-75	154.956	0.268097	0.03511	0.00895	0.02987	0.00847	0.00617	0.0002	0.9	-69	279	30	8	40	1	25	272.5	40	1
CY05-76	99.6274	0.239234	0.02226	0.01723	0.01576	0.0128	0.00514	0.00022	0.9	-646	697	16	13	33	1	51.5152	2057.58	33	1
CY05-77	61.8497	0.143266	0.03812	0.03341	0.02182	0.02044	0.00415	0.00028	0.9	-402	1016	22	20	27	2	18.5185	1588.89	27	2
CY05-78	151.484	0.21978	0.04743	0.0087	0.04076	0.00863	0.00623	0.0002	0.9	71	295	41	8	40	1	-2.5	-77.5	40	1
CY05-79	37.8017	0.3367	0.11732	0.04109	0.11637	0.04932	0.00719	0.00063	0.87	1916	637	112	45	46	4	-143.478	-4065.22	46	4
CY05-80	89.0768	0.27248	0.04283	0.01962	0.02945	0.01475	0.00499	0.00024	0.9	-132	595	29	15	32	2	9.375	512.5	32	2
CY05-81	65.2946	0.168634	0.00119	0.03442	0.00079	0.0229	0.00482	0.00033	0.9	-1925	1324	1	23	31	2	96.7742	6309.68	31	2
CY05-82	363.522	0.325733	0.05619	0.00487	0.03452	0.0038	0.00446	0.00012	0.9	460	165	34	4	28.7	0.8	-18.4669	-1502.79	28.7	0.8
CY05-83	231.787	0.33557	0.04921	0.00627	0.03696	0.00566	0.00545	0.00016	0.9	158	236	37	6	35	1	-5.71429	-351.429	35	1
CY05-84	345.083	0.436681	0.03424	0.00335	0.03244	0.00392	0.00687	0.00018	0.9	-104	155	32	4	44	1	27.2727	336.364	44	1
CY05-85	470.039	0.319489	0.04379	0.00281	0.04034	0.00347	0.00668	0.00017	0.9	-81	116	40	3	43	1	6.97674	288.372	43	1
CY05-86	198.594	0.333333	0.06058	0.00845	0.04178	0.00707	0.005	0.00017	0.9	624	261	42	7	32	1	-31.25	-1850	32	1
CY05-87	389.32	0.369004	0.0432	0.00313	0.03885	0.00369	0.00652	0.00017	0.9	-112	131	39	4	42	1	7.14286	366.667	42	1
CY05-88	438.315	0.746269	0.04607	0.0008	0.03949	0.00133	0.00622	0.00016	0.87	1	28	39	1	40	1	2.5	97.5	40	1
CY05-89	125.442	0.266667	0.05234	0.01187	0.04019	0.01039	0.00557	0.0002	0.9	300	379	40	10	36	1	-11.1111	-733.333	36	1
CY05-90	148.082	0.226244	0.14172	0.07238	0.014	0.00885	0.00072	0.0001	0.9	2248	997	14	9	4.6	0.6	-204.348	-48769.6	4.6	0.6
CY05-91	183.096	0.229358	0.03764	0.00702	0.03443	0.00734	0.00664	0.0002	0.9	-432	293	34	7	43	1	20.9302	1104.65	43	1
CY05-92	236.846	0.31348	0.05536	0.00549	0.05578	0.00699	0.00731	0.00022	0.9	427	189	55	7	47	1	-17.0213	-808.511	47	1
CY05-93	236.45	0.512821	0.05506	0.00881	0.04333	0.00816	0.00571	0.00021	0.82	415	294	43	8	37	1	-16.2162	-1021.62	37	1
CY05-94	369.369	0.515464	0.04885	0.00433	0.04796	0.00528	0.00712	0.00021	0.79	141	162	48	5	46	1	-4.34783	-206.522	46	1
CY05-95	128.009	0.33557	0.08767	0.01083	0.07905	0.0122	0.00654	0.00024	0.88	1375	209	77	11	42	2	-83.3333	-3173.81	42	2
CY05-96	1097.73	0.735294	0.04036	0.00207	0.02118	0.00156	0.00381	0.0001	0.9	-269	102	21	2	24.5	0.6	14.2857	1197.96	24.5	0.6
CY05-97	220.667	0.330033	0.05099	0.00533	0.04801	0.00607	0.00683	0.00019	0.82	240	195	48	6	44	1	-9.09091	-445.455	44	1
CY05-98	111.111	0.318471	0.04579	0.01178	0.04111	0.01186	0.00651	0.00023	0.9	-13	375	41	12	42	1	2.38095	130.952	42	1
CY05-99	172.795	0.456621	0.0487	0.0107	0.03323	0.00837	0.00495	0.00018	0.9	133	350	33	8	32	1	-3.125	-315.625	32	1
CY05-100	73.5361	0.292398	0.04794	0.02586	0.03224	0.01904	0.00488	0.00028	0.9	96	812	32	19	31	2	-3.22581	-209.677	31	2
CY05-101	252.579	0.280899	0.05231	0.00494	0.04777	0.00571	0.00662	0.00019	0.9	299	196	47	6	43	1	-9.30233	-595.349	43	1
CY05-102	358.275	0.31348	0.05425	0.00465	0.03692	0.00407	0.00494	0.00014	0.9	381	178	37	4	31.8	0.9	-16.3522	-1098.11	31.8	0.9
CY05-103	667.761	0.440529	0.11845	0.03156	0.08219	0.02587	0.00503	0.00027	0.91	1933	523	80	24	32	2	-150	-5940.62	32	2
CY05-104	342.723	0.316456	0.04935	0.00365	0.04278	0.00416	0.00629	0.00017	0.9	164	151	43	4	40	1	-7.5	-310	40	1
CY05-105	608.124	0.598802	0.04491	0.00199	0.04063	0.00264	0.00656	0.00016	0.9	-24	84	40	3	42	1	4.7619	157.143	42	1
CY05-106	184.313	0.190114	0.06233	0.01087	0.04323	0.00881	0.00503	0.00017	0.88	686	347	43	9	32	1	-34.375	-2043.75	32	1
CY05-107	96.5384	0.324675	0.0282	0.02001	0.01822	0.01366	0.00469	0.00021	0.9	-364	753	18	14	30	1	40	1313.33	30	1
CY05-108	28.5497	0.239234	0.23264	0.03431	0.27566	0.06144	0.00859	0.00077	0.9	3070	227	247	49	55	5	-349.091	-5481.82	55	5

## Sheet: CY-01
Supplementary Table A.1 U-Pb ages of detrital zircons from every sample
Spot	U(ppm)	Th/U	U-Th-Pb ratios							Ages (Ma)						Discordance		Inferred Age (Ma)	1σ
			207Pb/206Pb	1σ	207Pb/235U	1σ	206Pb/238U	1σ	rr	207Pb/206Pb	1σ	207Pb/235U	1σ	206Pb/238U	1σ	<1000 Ma	>1000 Ma
Ages assumed < 0.5 Ma
CY01-01	139.937	0.229058
CY01-02	215.092	0.507927
CY01-03	81.2313	0.581447
CY01-04	56.6152	0.429711
CY01-05	43.4922	0.339303
CY01-06	92.8053	0.495298
CY01-07	286.828	0.396554
CY01-08	39.2925	0.332093
CY01-09	1112.67	0.332896
CY01-10	58.234	0.354451
CY01-11	73.2179	0.617044
CY01-12	37.2875	0.364987
CY01-13	51.272	0.169137
CY01-14	40.8758	0.391605
CY01-15	40.1117	0.521651
CY01-16	33.4959	0.386947
CY01-17	240.655	0.542744
CY01-18	85.6662	0.567499
CY01-19	127.615	0.395066
CY01-20	236.657	0.678357
CY01-21	72.4773	0.355869
CY01-22	92.9248	0.411431
CY01-23	116.508	0.349253
CY01-24	115.807	0.47321

## Sheet: BB-01
Supplementary Table A.1 U-Pb ages of detrital zircons from every sample
Spot	U(ppm)	Th/U	U-Th-Pb ratios							Ages (Ma)						Discordance		Inferred Age (Ma)	1σ
			207Pb/206Pb	1σ	207Pb/235U	1σ	206Pb/238U	1σ	rr	207Pb/206Pb	1σ	207Pb/235U	1σ	206Pb/238U	1σ	<1000 Ma	>1000 Ma
BB01-01	136.119	0.75188	0.04596	0.00387	0.1517	0.01624	0.02394	0.00063	0.9	-4	174	143	14	153	4	6.53595	102.614	153	4
BB01-03	144.653	1.0989	0.06025	0.00212	0.30387	0.0171	0.03658	0.00093	0.9	613	75	269	13	232	6	-15.9483	-164.224	232	6
BB01-05	65.2239	0.694444	0.07114	0.01536	0.13174	0.03294	0.01343	0.00052	0.9	961	468	126	30	86	3	-46.5116	-1017.44	86	3
BB01-07	106.242	0.606061	0.0418	0.0114	0.07081	0.02146	0.01229	0.00042	0.9	-188	357	69	20	79	3	12.6582	337.975	79	3
BB01-08	366.605	0.101626	0.04878	0.00093	0.24284	0.00922	0.03611	0.00089	0.9	137	44	221	8	229	6	3.49345	40.1747	229	6
BB01-09	87.0893	0.625	0.05765	0.0121	0.10324	0.02484	0.01299	0.00045	0.9	517	443	100	23	83	3	-20.4819	-522.892	83	3
BB01-11	53.1808	0.735294	0.07378	0.01871	0.13864	0.04047	0.01363	0.00059	0.9	1035	555	132	36	87	4	-51.7241	-1089.66	87	4
BB01-12	76.6635	0.268097	0.14628	0.0303	0.10701	0.02813	0.00531	0.00034	0.9	2303	382	103	26	34	2	-202.941	-6673.53	34	2
BB01-15	132.052	0.819672	0.05142	0.00368	0.18742	0.01772	0.02644	0.0007	0.9	260	160	174	15	168	4	-3.57143	-54.7619	168	4
BB01-16	104.357	0.578035	0.04431	0.01009	0.08153	0.0209	0.01334	0.00043	0.9	-55	318	80	20	85	3	5.88235	164.706	85	3
BB01-17	214.703	0.961538	0.05398	0.00523	0.09445	0.01143	0.01269	0.00035	0.9	370	216	92	11	81	2	-13.5802	-356.79	81	2
BB01-18	173.446	0.555556	0.055	0.00518	0.12268	0.0146	0.01618	0.00046	0.9	412	210	117	13	103	3	-13.5922	-300	103	3
BB01-19	131.795	0.609756	0.05121	0.00391	0.17941	0.01786	0.02541	0.00068	0.9	250	169	168	15	162	4	-3.7037	-54.321	162	4
BB01-20	454.836	0.833333	0.0498	0.00113	0.19551	0.00839	0.02847	0.00073	0.9	186	52	181	7	181	5	0	-2.76243	181	5
BB01-22	51.052	0.719424	0.05089	0.02705	0.08125	0.04719	0.01158	0.00064	0.9	236	904	79	44	74	4	-6.75676	-218.919	74	4
BB01-23	111.383	0.469484	0.04048	0.01261	0.07311	0.02521	0.0131	0.00049	0.9	-262	408	72	24	84	3	14.2857	411.905	84	3
BB01-24	152.899	0.769231	0.04748	0.0082	0.07336	0.01464	0.01121	0.00034	0.9	73	293	72	14	72	2	0	-1.38889	72	2
BB01-26	122.218	0.564972	0.05549	0.00849	0.10046	0.01806	0.01313	0.0004	0.9	432	332	97	17	84	3	-15.4762	-414.286	84	3
BB01-27	209.811	0.862069	0.04986	0.00215	0.17955	0.01156	0.02612	0.00066	0.9	188	98	168	10	166	4	-1.20482	-13.253	166	4
BB01-31	177.407	1.05263	0.05314	0.00662	0.08436	0.01263	0.01151	0.00033	0.9	335	277	82	12	74	2	-10.8108	-352.703	74	2
BB01-32	87.3012	0.518135	0.0858	0.011	0.15651	0.02482	0.01323	0.00046	0.9	1334	253	148	22	85	3	-74.1176	-1469.41	85	3
BB01-34	98.813	0.598802	0.04939	0.01108	0.0867	0.02198	0.01273	0.00042	0.9	166	377	84	21	82	3	-2.43902	-102.439	82	3
BB01-37	128.425	0.943396	0.0628	0.00751	0.11503	0.0168	0.01328	0.0004	0.9	701	260	111	15	85	3	-30.5882	-724.706	85	3
BB01-39	246.786	0.917431	0.04956	0.0018	0.17501	0.01004	0.02561	0.00065	0.9	174	83	164	9	163	4	-0.613497	-6.74847	163	4
BB01-40	170.796	0.714286	0.05866	0.00555	0.11625	0.01382	0.01437	0.0004	0.9	555	208	112	13	92	3	-21.7391	-503.261	92	3
BB01-41	105.107	0.806452	0.06106	0.00951	0.11034	0.02029	0.01311	0.00042	0.9	641	346	106	19	84	3	-26.1905	-663.095	84	3
BB01-42	231.833	0.806452	0.04951	0.00206	0.16873	0.01063	0.02472	0.00063	0.9	172	94	158	9	157	4	-0.636943	-9.55414	157	4
BB01-43	226.733	0.952381	0.04069	0.00488	0.07428	0.01077	0.01324	0.00038	0.9	-250	185	73	10	85	2	14.1176	394.118	85	2
BB01-44	125.778	0.606061	0.04633	0.00726	0.0951	0.01739	0.01489	0.00044	0.9	15	262	92	16	95	3	3.15789	84.2105	95	3
BB01-46	38.255	0.478469	0.04116	0.03	0.0705	0.05494	0.01242	0.0007	0.9	-224	1050	69	52	80	4	13.75	380	80	4
BB01-47	104.346	0.483092	0.03584	0.01043	0.06541	0.02088	0.01324	0.00042	0.9	-40	403	64	20	85	3	24.7059	147.059	85	3
BB01-48	64.1462	0.460829	0.07153	0.01839	0.13336	0.03961	0.01352	0.00061	0.9	973	567	127	35	87	4	-45.977	-1018.39	87	4
BB01-50	100.08	1	0.06558	0.01117	0.12335	0.02491	0.01364	0.00049	0.9	793	375	118	23	87	3	-35.6322	-811.494	87	3
BB01-51	211.088	0.483092	1.13619	0.20796	0.05072	0.01036	0.00032	0.00011	0.9	5416	265	50	10	2.1	0.7	-2280.95	-257805	2.1	0.7
BB01-52	107.981	0.60241	0.10041	0.00876	0.37632	0.04492	0.02718	0.00099	0.91	1632	165	324	33	173	6	-87.2832	-843.353	173	6
BB01-53	33.8245	0.460829	0.04991	0.03538	0.0866	0.06642	0.01259	0.00082	0.9	191	1168	84	62	81	5	-3.7037	-135.802	81	5
BB01-54	108.501	0.334448	0.05082	0.00274	0.29425	0.02234	0.042	0.00108	0.9	233	122	262	18	265	7	1.13208	12.0755	265	7
BB01-55	151.812	0.775194	0.04335	0.00268	0.19235	0.01609	0.03218	0.00082	0.9	-105	134	179	14	204	5	12.2549	151.471	204	5
BB01-57	68.0162	0.480769	0.04722	0.01611	0.08428	0.03165	0.01295	0.0005	0.9	60	515	82	30	83	3	1.20482	27.7108	83	3
BB01-58	51.3968	0.549451	0.05555	0.00716	0.27825	0.04307	0.03633	0.00107	0.9	434	286	249	34	230	7	-8.26087	-88.6957	230	7
BB01-60	74.587	0.52356	0.06299	0.01704	0.11073	0.03426	0.01275	0.00056	0.9	708	548	107	31	82	4	-30.4878	-763.415	82	4
BB01-61	63.5958	0.613497	0.06124	0.00861	0.223	0.03759	0.02642	0.00084	0.9	648	310	204	31	168	5	-21.4286	-285.714	168	5
BB01-62	94.1952	0.680272	0.05013	0.00641	0.17035	0.02614	0.02465	0.00072	0.9	201	273	160	23	157	5	-1.91083	-28.0255	157	5
BB01-63	191.274	0.943396	0.03885	0.00584	0.07332	0.01282	0.01369	0.00038	0.9	-358	239	72	12	88	2	18.1818	506.818	88	2
BB01-66	111.309	0.729927	0.05322	0.00497	0.17936	0.02105	0.02445	0.00067	0.9	338	208	168	18	156	4	-7.69231	-116.667	156	4
BB01-67	31.962	0.649351	0.06785	0.04172	0.12137	0.08335	0.01298	0.00105	0.9	864	1266	116	75	83	7	-39.759	-940.964	83	7
BB01-68	90.1128	0.37594	0.04343	0.03224	0.03396	0.02703	0.00567	0.00034	0.9	-100	1101	34	27	36	2	5.55556	377.778	36	2
BB01-70	143.606	0.735294	0.0575	0.0035	0.19828	0.01662	0.02501	0.00067	0.9	511	133	184	14	159	4	-15.7233	-221.384	159	4
BB01-71	247.881	0.549451	0.04528	0.00352	0.09691	0.00976	0.01552	0.00041	0.9	-5	169	94	9	99	3	5.05051	105.051	99	3
BB01-72	68.6221	0.595238	0.04802	0.0084	0.17925	0.03626	0.02708	0.00084	0.9	100	303	167	31	172	5	2.90698	41.8605	172	5
BB01-73	183.982	0.680272	0.05467	0.00402	0.10229	0.00987	0.01357	0.00036	0.9	399	164	99	9	87	2	-13.7931	-358.621	87	2
BB01-74	235.83	0.833333	0.04849	0.00142	0.17397	0.00851	0.02603	0.00062	0.9	123	67	163	7	166	4	1.80723	25.9036	166	4
BB01-75	163.714	0.680272	0.05057	0.00223	0.17228	0.01115	0.02471	0.0006	0.9	221	100	161	10	157	4	-2.54777	-40.7643	157	4
BB01-76	106.284	0.364964	0.04443	0.02009	0.03079	0.01512	0.00503	0.00022	0.9	-48	679	31	15	32	1	3.125	250	32	1
BB01-77	19.0835	0.141243	0.04756	0.0928	0.0486	0.10133	0.00741	0.00111	0.9	77	1926	48	98	48	7	0	-60.4167	48	7
BB01-78	33.5178	0.531915	0.06469	0.02827	0.10887	0.05319	0.01221	0.00071	0.9	764	873	105	49	78	5	-34.6154	-879.487	78	5
BB01-79	63.3576	0.980392	0.05308	0.00675	0.17903	0.0272	0.02446	0.00069	0.9	332	283	167	23	156	4	-7.05128	-112.821	156	4
BB01-81	144.147	0.531915	0.05454	0.0036	0.19001	0.01719	0.02528	0.00072	0.9	393	147	177	15	161	5	-9.93789	-144.099	161	5
BB01-82	106.192	0.719424	0.0479	0.00376	0.16343	0.01649	0.02475	0.00064	0.9	94	167	154	14	158	4	2.53165	40.5063	158	4
BB01-83	166.409	0.657895	0.0524	0.00224	0.18039	0.0115	0.02497	0.00062	0.9	303	96	168	10	159	4	-5.66038	-90.566	159	4
BB01-85	91.7446	1.08696	0.06416	0.00525	0.22468	0.02429	0.0254	0.00077	0.9	747	173	206	20	162	5	-27.1605	-361.111	162	5
BB01-86	22.0502	0.135685	0.06369	0.12611	0.04801	0.10435	0.00547	0.00119	0.9	731	2951	48	101	35	8	-37.1429	-1988.57	35	8
BB01-87	111.035	0.609756	0.05225	0.00608	0.10954	0.0154	0.01521	0.00042	0.9	296	258	106	14	97	3	-9.27835	-205.155	97	3
BB01-88	355.089	0.657895	0.04718	0.00108	0.16317	0.0068	0.02508	0.00059	0.9	58	51	153	6	160	4	4.375	63.75	160	4
BB01-89	62.4765	0.190476	0.07296	0.03722	0.06015	0.03461	0.00598	0.00044	0.9	1013	1084	59	33	38	3	-55.2632	-2565.79	38	3
BB01-92	89.1192	0.704225	0.05471	0.00497	0.19557	0.0227	0.02593	0.00075	0.9	400	203	181	19	165	5	-9.69697	-142.424	165	5
BB01-93	47.1685	0.787402	0.00897	0.0219	0.01518	0.03767	0.01228	0.00055	0.9	-1394	959	15	38	79	4	81.0127	1864.56	79	4
BB01-94	52.6751	0.549451	0.04914	0.00871	0.16541	0.03381	0.02442	0.00075	0.9	155	312	155	29	156	5	0.641026	0.641026	156	5
BB01-95	98.9296	0.19685	0.05845	0.02056	0.05585	0.02215	0.00693	0.00035	0.9	547	650	55	21	45	2	-22.2222	-1115.56	45	2
BB01-96	82.4563	0.425532	0.04449	0.00998	0.08158	0.02058	0.0133	0.00042	0.9	-45	314	80	19	85	3	5.88235	152.941	85	3
BB01-100	126.23	0.411523	0.04873	0.00677	0.08756	0.01436	0.01303	0.00037	0.9	135	283	85	13	83	2	-2.40964	-62.6506	83	2
BB01-101	135.19	0.625	0.04055	0.00773	0.06165	0.01333	0.01103	0.00032	0.9	-258	252	61	13	71	2	14.0845	463.38	71	2
BB01-102	47.231	0.617284	0.05899	0.00769	0.29951	0.0475	0.03683	0.00119	0.9	567	289	266	37	233	7	-14.1631	-143.348	233	7
BB01-103	236.534	1.42857	0.04768	0.00492	0.07341	0.00947	0.01117	0.00033	0.9	83	215	72	9	72	2	0	-15.2778	72	2
BB01-106	552.464	0.775194	0.04645	0.00176	0.15848	0.00933	0.02475	0.00062	0.9	21	74	149	8	158	4	5.6962	86.7089	158	4
BB01-107	250.76	0.632911	0.04039	0.01503	0.07091	0.02871	0.01273	0.00047	0.9	-267	498	70	27	82	3	14.6341	425.61	82	3
BB01-109	61.6966	0.704225	0.0533	0.00452	0.18454	0.01993	0.02511	0.00067	0.9	342	190	172	17	160	4	-7.5	-113.75	160	4
BB01-110	95.8855	0.505051	0.04027	0.01155	0.06932	0.0219	0.01248	0.00041	0.9	-274	373	68	21	80	3	15	442.5	80	3
BB01-111	84.5466	0.606061	0.04916	0.00274	0.17019	0.01319	0.02511	0.00064	0.9	155	122	160	11	160	4	0	3.125	160	4
BB01-112	152.126	0.344828	0.0548	0.00779	0.19815	0.03335	0.02622	0.00078	0.9	404	313	184	28	167	5	-10.1796	-141.916	167	5
BB01-113	56.5597	1.08696	0.04758	0.001	0.1629	0.00659	0.02483	0.00062	0.9	78	48	153	6	158	4	3.16456	50.6329	158	4
BB01-114	502.91	0.568182	0.03852	0.01028	0.0582	0.01718	0.01096	0.00035	0.9	-378	352	57	16	70	2	18.5714	640	70	2
BB01-115	109.348	0.546448	0.05039	0.00228	0.1883	0.01272	0.02711	0.00072	0.9	213	95	175	11	172	5	-1.74419	-23.8372	172	5
BB01-117	129.714	0.520833	0.04798	0.00564	0.10222	0.01452	0.01545	0.00043	0.9	98	224	99	13	99	3	0	1.0101	99	3
BB01-118	212.345	1.31579	0.04565	0.00205	0.15753	0.01044	0.02503	0.00063	0.9	-20	82	149	9	159	4	6.28931	112.579	159	4
BB01-119	70.4905	0.746269	0.04419	0.0141	0.07571	0.0266	0.01243	0.00045	0.9	-61	429	74	25	80	3	7.5	176.25	80	3
BB01-120	58.2996	0.714286	0.05089	0.00754	0.1898	0.03305	0.02705	0.0008	0.9	236	279	176	28	172	5	-2.32558	-37.2093	172	5
BB01-121	81.1711	0.456621	0.05636	0.01093	0.10296	0.02299	0.01325	0.00044	0.9	467	367	100	21	85	3	-17.6471	-449.412	85	3
BB01-122	75.535	0.45045	0.04853	0.01168	0.08828	0.02391	0.01319	0.00045	0.9	125	368	86	22	84	3	-2.38095	-48.8095	84	3
BB01-123	92.0456	0.892857	0.04761	0.00501	0.16308	0.02107	0.02485	0.00068	0.9	80	202	153	18	158	4	3.16456	49.3671	158	4
BB01-124	86.8544	0.645161	0.04485	0.00525	0.1558	0.02205	0.0252	0.0007	0.9	-27	200	147	19	160	4	8.125	116.875	160	4
BB01-125	161.108	0.813008	0.04705	0.00262	0.16357	0.0127	0.02522	0.00065	0.9	52	108	154	11	161	4	4.34783	67.7019	161	4
BB01-127	157.39	0.806452	0.04724	0.00529	0.09359	0.01271	0.01437	0.00039	0.9	61	212	91	12	92	2	1.08696	33.6957	92	2
BB01-128	147.563	0.877193	0.05017	0.00362	0.17031	0.01641	0.02462	0.00069	0.9	203	149	160	14	157	4	-1.91083	-29.2994	157	4
BB01-130	209.624	0.740741	0.04959	0.00199	0.17052	0.01044	0.02494	0.00063	0.9	176	85	160	9	159	4	-0.628931	-10.6918	159	4
BB01-131	150.443	0.454545	0.05135	0.0059	0.08868	0.01243	0.01253	0.00036	0.9	257	227	86	12	80	2	-7.5	-221.25	80	2
BB01-132	143.638	0.60241	0.04122	0.0061	0.07677	0.01327	0.01351	0.00038	0.9	-220	201	75	13	87	2	13.7931	352.874	87	2
BB01-133	89.9973	0.757576	0.06151	0.01207	0.0985	0.02201	0.01161	0.00036	0.9	657	391	95	20	74	2	-28.3784	-787.838	74	2
BB01-134	69.9575	0.473934	0.05306	0.01334	0.09677	0.02705	0.01323	0.00042	0.9	331	435	94	25	85	3	-10.5882	-289.412	85	3
BB01-135	110.865	0.444444	0.04915	0.0084	0.08753	0.01699	0.01292	0.00034	0.9	155	299	85	16	83	2	-2.40964	-86.747	83	2
BB01-136	47.7531	0.42735	0.05714	0.01894	0.10776	0.03956	0.01368	0.00055	0.9	497	577	104	36	88	3	-18.1818	-464.773	88	3
BB01-138	108.652	0.735294	0.0543	0.00403	0.18961	0.0178	0.02533	0.00057	0.9	384	155	176	15	161	4	-9.31677	-138.509	161	4
BB01-139	357.223	0.943396	0.08477	0.00822	0.07933	0.00971	0.00679	0.00019	0.92	1310	179	78	9	44	1	-77.2727	-2877.27	44	1
BB01-140	334.471	0.854701	0.05287	0.00099	0.24072	0.00832	0.03302	0.00066	0.9	323	39	219	7	209	4	-4.78469	-54.5455	209	4
Ages assumed < 0.5 Ma
BB01-02	209.243	0.430738
BB01-04	328.045	0.563886
BB01-06	471.292	0.786607
BB01-10	495.707	0.772959
BB01-13	226.87	0.466987
BB01-14	293.818	0.517972
BB01-21	316.862	0.582856
BB01-25	329.068	0.639555
BB01-28	1565.18	1.14629
BB01-29	1184.29	1.34204
BB01-30	229.944	0.652755
BB01-33	312.648	0.816888
BB01-35	293.951	0.0973113
BB01-36	353.123	0.663257
BB01-38	396.79	0.643983
BB01-45	323.06	0.688137
BB01-49	379.399	0.621613
BB01-56	443.478	0.731985
BB01-59	461.908	0.857973
BB01-64	295.113	0.499823
BB01-65	280.041	0.679477
BB01-69	503.149	0.758355
BB01-80	365.759	0.478458
BB01-84	819.456	0.862651
BB01-90	307.385	0.562471
BB01-91	436.878	0.789397
BB01-97	830.427	0.805631
BB01-98	384.035	0.541703
BB01-99	462.316	0.810688
BB01-104	471.927	0.310794
BB01-105	552.464	0.81953
BB01-108	535.778	0.716219
BB01-116	421.43	0.706434
BB01-126	260.978	0.437585
BB01-129	185.536	0.456222
BB01-137	331.504	0.736379

## Sheet: PE-01
Supplementary Table A.1 U-Pb ages of detrital zircons from every sample
Spot	U(ppm)	Th/U	U-Th-Pb ratios							Ages (Ma)						Discordance		Inferred Age (Ma)	1σ
			207Pb/206Pb	1σ	207Pb/235U	1σ	206Pb/238U	1σ	rr	207Pb/206Pb	1σ	207Pb/235U	1σ	206Pb/238U	1σ	<1000 Ma	>1000 Ma
PE01-01	127.085	0.645161	0.04354	0.03539	0.01796	0.01567	0.00299	0.0002	0.9	-95	1124	18	16	19	1	5.26316	600	19	1
PE01-02	35.3695	0.343643	0.04584	0.08314	0.0312	0.0602	0.00494	0.00064	0.9	-10	1731	31	59	32	4	3.125	131.25	32	4
PE01-03	10596.7	1.6129	0.05683	0.00066	0.06127	0.00162	0.00782	0.0002	0.9	485	26	60	2	50	1	-20	-870	50	1
PE01-04	246.317	0.671141	0.05212	0.01605	0.02444	0.00842	0.0034	0.00014	0.9	291	528	25	8	21.9	0.9	-14.1553	-1228.77	21.9	0.9
PE01-05	96.4495	0.373134	0.04676	0.04169	0.02457	0.0238	0.00381	0.00033	0.9	37	1211	25	24	25	2	0	-48	25	2
PE01-06	109.155	0.222717	0.07257	0.05797	0.02411	0.02148	0.00241	0.00025	0.9	1002	1411	24	21	16	2	-50	-6162.5	16	2
PE01-07	107.059	0.444444	0.04306	0.03968	0.02296	0.02264	0.00387	0.00028	0.9	-120	1184	23	22	25	2	8	580	25	2
PE01-08	121.14	0.505051	0.04809	0.01263	0.05629	0.01655	0.00849	0.0003	0.9	104	431	56	16	54	2	-3.7037	-92.5926	54	2
PE01-09	104.963	0.555556	0.05187	0.04153	0.02823	0.0247	0.00395	0.00033	0.9	280	1224	28	24	25	2	-12	-1020	25	2
PE01-10	273.638	0.515464	0.0331	0.01858	0.016	0.00963	0.00351	0.00016	0.9	-151	788	16	10	23	1	30.4348	756.522	23	1
PE01-11	559.933	0.584795	0.03348	0.00715	0.01733	0.00415	0.00375	0.00011	0.9	-136	266	17	4	24.1	0.7	29.4606	664.315	24.1	0.7
PE01-12	464.814	1.02041	0.04023	0.00875	0.02596	0.00643	0.00468	0.00016	0.9	-276	315	26	6	30	1	13.3333	1020	30	1
PE01-13	138.203	0.414938	0.0447	0.03489	0.02433	0.02042	0.00395	0.00026	0.9	-35	1144	24	20	25	2	4	240	25	2
PE01-14	250.84	0.787402	0.06092	0.01919	0.02322	0.00821	0.00276	0.00012	0.9	636	593	23	8	17.8	0.8	-29.2135	-3473.03	17.8	0.8
PE01-15	123.462	0.581395	0.0605	0.0302	0.03256	0.01796	0.0039	0.00023	0.9	622	971	33	18	25	1	-32	-2388	25	1
PE01-16	204.022	0.598802	0.04701	0.01908	0.02332	0.01033	0.0036	0.00015	0.9	50	648	23	10	23.2	1	0.862069	-115.517	23.2	1
PE01-17	613.233	1.05263	0.03817	0.00781	0.01842	0.00428	0.0035	0.00011	0.9	-399	320	19	4	22.5	0.7	15.5556	1873.33	22.5	0.7
PE01-18	194.508	0.591716	0.03969	0.03484	0.011	0.01029	0.00201	0.00013	0.9	-308	1154	11	10	12.9	0.8	14.7287	2487.6	12.9	0.8
PE01-19	206.252	0.694444	0.08562	0.01729	0.04255	0.01015	0.00361	0.00015	0.9	1330	420	42	10	23.2	1	-81.0345	-5632.76	23.2	1
PE01-20	129.283	0.847458	0.08544	0.01919	0.08748	0.02368	0.00743	0.00039	0.9	1326	476	85	22	48	2	-77.0833	-2662.5	48	2
PE01-21	260.913	0.460829	0.03739	0.01652	0.01851	0.00882	0.00359	0.00014	0.9	-447	638	19	9	23.1	0.9	17.7489	2035.06	23.1	0.9
PE01-22	219.663	0.598802	0.07964	0.01403	0.04586	0.00962	0.00418	0.00016	0.9	1188	368	46	9	27	1	-70.3704	-4300	27	1
PE01-23	166.892	0.389105	0.06052	0.0198	0.03334	0.01224	0.004	0.00018	0.9	622	615	33	12	26	1	-26.9231	-2292.31	26	1
PE01-24	767.567	0.529101	0.04167	0.00561	0.02039	0.0033	0.00355	0.00011	0.9	-195	211	20	3	22.8	0.7	12.2807	955.263	22.8	0.7
PE01-25	297.924	0.653595	0.03239	0.01586	0.01634	0.0086	0.00366	0.00015	0.9	-181	655	16	9	23.6	1	32.2034	866.949	23.6	1
PE01-26	282.982	0.653595	0.02833	0.01696	0.01338	0.0085	0.00343	0.00014	0.9	-358	762	13	9	22.1	0.9	41.1765	1719.91	22.1	0.9
PE01-27	173.118	0.355872	0.00895	0.02732	0.00424	0.01314	0.00344	0.00018	0.9	-1395	1061	4	13	22	1	81.8182	6440.91	22	1
PE01-28	195.488	0.436681	0.03502	0.04705	0.00836	0.01188	0.00173	0.00015	0.9	-73	1119	8	12	11.1	1	27.9279	757.658	11.1	1
PE01-29	139.813	0.404858	0.01936	0.03122	0.00927	0.01543	0.00347	0.0002	0.9	-794	962	9	16	22	1	59.0909	3709.09	22	1
PE01-30	18.1796	0.4329	0.04394	0.0987	0.05396	0.12862	0.00891	0.00137	0.9	-74	2105	53	124	57	9	7.01754	229.825	57	9
PE01-32	94.0045	0.699301	0.07858	0.0462	0.03646	0.02412	0.00337	0.00028	0.9	1162	1224	36	24	22	2	-63.6364	-5181.82	22	2
PE01-33	198.995	0.458716	0.07737	0.01878	0.03829	0.0108	0.00359	0.00016	0.9	1131	535	38	11	23	1	-65.2174	-4817.39	23	1
PE01-34	310.997	0.549451	0.03901	0.01372	0.01844	0.00706	0.00343	0.00012	0.9	-348	504	19	7	22.1	0.8	14.0271	1674.66	22.1	0.8
PE01-36	333.439	0.595238	0.02463	0.08193	0.01463	0.05034	0.00431	0.00055	0.9	-530	1836	15	50	28	4	46.4286	1992.86	28	4
PE01-37	606.55	0.917431	0.02587	0.01038	0.00851	0.00367	0.00239	8e-05	0.9	-471	452	9	4	15.4	0.5	41.5584	3158.44	15.4	0.5
PE01-38	196.455	0.420168	0.00606	0.02809	0.00326	0.01529	0.0039	0.00024	0.9	-1584	1138	3	15	25	2	88	6436	25	2
PE01-40	320.436	0.584795	0.04795	0.01241	0.02409	0.00694	0.00364	0.00012	0.9	97	423	24	7	23.4	0.8	-2.5641	-314.53	23.4	0.8
PE01-41	86.9483	0.826446	0.03878	0.02415	0.03779	0.02516	0.00707	0.00034	0.9	-362	940	38	25	45	2	15.5556	904.444	45	2
PE01-42	242.449	0.436681	0.07732	0.02672	0.02914	0.01158	0.00273	0.00016	0.9	1129	731	29	11	18	1	-61.1111	-6172.22	18	1
PE01-43	125.197	0.208333	0.02787	0.10806	0.00636	0.02569	0.00166	0.0003	0.9	-379	2601	6	26	11	2	45.4545	3545.45	11	2
PE01-44	140.184	0.787402	0.092	0.03755	0.03974	0.01891	0.00313	0.00024	0.9	1467	903	40	18	20	2	-100	-7235	20	2
PE01-45	589.193	0.531915	0.02699	0.00807	0.01282	0.0042	0.00344	0.00011	0.9	-419	333	13	4	22.1	0.7	41.1765	1995.93	22.1	0.7
PE01-46	303.285	0.571429	0.04304	0.0151	0.01909	0.00733	0.00322	0.00012	0.9	-121	520	19	7	20.7	0.8	8.21256	684.541	20.7	0.8
PE01-47	243.243	0.584795	0.057	0.01153	0.03571	0.00825	0.00454	0.00016	0.86	492	417	36	8	29.2	1	-23.2877	-1584.93	29.2	1
PE01-48	389.396	0.529101	0.02829	0.01331	0.01392	0.007	0.00357	0.00013	0.9	-360	568	14	7	23	0.8	39.1304	1665.22	23	0.8
PE01-49	138.599	0.278552	0.10929	0.05652	0.0293	0.01804	0.00194	0.00023	0.87	1788	1175	29	18	13	1	-123.077	-13653.8	13	1
PE01-50	41.7366	0.330033	0.05251	0.12216	0.0244	0.06109	0.00337	0.00067	0.9	308	2758	24	61	22	4	-9.09091	-1300	22	4
PE01-51	164.008	0.588235	0.05913	0.02551	0.02853	0.01361	0.0035	0.00018	0.9	572	806	29	13	23	1	-26.087	-2386.96	23	1
PE01-52	462.287	0.719424	0.04362	0.01076	0.01856	0.00511	0.00309	0.0001	0.9	-90	364	19	5	19.9	0.6	4.52261	552.261	19.9	0.6
PE01-53	88.2293	0.555556	0.08532	0.06804	0.03553	0.03229	0.00302	0.00038	0.9	1323	1513	35	32	19	2	-84.2105	-6863.16	19	2
PE01-54	127.428	0.224719	0.09951	0.05701	0.02638	0.01742	0.00192	0.00019	0.9	1615	1274	26	17	12	1	-116.667	-13358.3	12	1
PE01-55	98.7544	0.21322	0.09926	0.07661	0.02554	0.02273	0.00187	0.00025	0.9	1610	1588	26	23	12	2	-116.667	-13316.7	12	2
PE01-56	152.574	0.584795	0.04688	0.03045	0.02056	0.01439	0.00318	0.00018	0.9	43	1044	21	14	20	1	-5	-115	20	1
PE01-57	465.172	0.961538	0.05821	0.00933	0.02615	0.0049	0.00326	0.0001	0.9	538	360	26	5	21	0.6	-23.8095	-2461.9	21	0.6
PE01-58	1147.94	1.49254	0.04247	0.00256	0.02577	0.00211	0.0044	0.00011	0.9	-151	135	26	2	28.3	0.7	8.12721	633.569	28.3	0.7
PE01-59	159.981	0.337838	0.07599	0.04594	0.02803	0.01926	0.00268	0.00025	0.9	1095	1258	28	19	17	2	-64.7059	-6341.18	17	2
PE01-60	154.239	0.552486	0.08523	0.02089	0.04892	0.01396	0.00416	0.00019	0.9	1321	528	48	14	27	1	-77.7778	-4792.59	27	1
PE01-61	72.9515	0.413223	0.14776	0.03651	0.09662	0.03008	0.00474	0.00035	0.9	2320	479	94	28	30	2	-213.333	-7633.33	30	2
PE01-62	233.364	0.531915	0.00759	0.04909	0.00175	0.01145	0.00167	0.00014	0.9	-1483	1406	2	12	10.8	0.9	81.4815	13831.5	10.8	0.9
PE01-63	207.803	0.735294	0.02901	0.02037	0.01393	0.01032	0.00348	0.00015	0.9	-328	881	14	10	22.4	1	37.5	1564.29	22.4	1
PE01-64	249.423	0.520833	0.07541	0.01616	0.03499	0.00869	0.00337	0.00013	0.9	1079	466	35	9	21.7	0.8	-61.2903	-4872.35	21.7	0.8
PE01-65	324.898	0.653595	0.04507	0.01286	0.02109	0.00668	0.00339	0.00012	0.9	-16	432	21	7	21.8	0.8	3.66972	173.394	21.8	0.8
PE01-66	155.893	0.229358	0.0595	0.04681	0.01697	0.01459	0.00207	0.00017	0.9	585	1278	17	15	13	1	-30.7692	-4400	13	1
PE01-67	227.713	0.645161	0.04452	0.01899	0.02136	0.00993	0.00348	0.00015	0.9	-44	662	21	10	22.4	1	6.25	296.429	22.4	1
PE01-68	528.4	0.628931	0.0475	0.01282	0.0145	0.00438	0.00221	8e-05	0.9	74	371	15	4	14.2	0.5	-5.6338	-421.127	14.2	0.5
PE01-71	216.811	0.52356	0.04458	0.01886	0.02242	0.01036	0.00365	0.00016	0.9	-41	539	23	10	23	1	0	278.261	23	1
PE01-72	445.622	0.421941	0.08051	0.01025	0.042	0.00661	0.00378	0.00013	0.89	1210	221	42	6	24.3	0.8	-72.8395	-4879.42	24.3	0.8
PE01-74	137.503	0.613497	0.05618	0.01936	0.02981	0.01144	0.00385	0.00017	0.9	459	550	30	11	25	1	-20	-1736	25	1
PE01-75	128.456	0.662252	0.13224	0.04302	0.03117	0.01253	0.00171	0.00015	0.9	2128	583	31	12	11	1	-181.818	-19245.5	11	1
PE01-76	614.778	0.925926	0.05093	0.00558	0.02467	0.00332	0.00351	0.0001	0.9	238	211	25	3	22.6	0.6	-10.6195	-953.097	22.6	0.6
PE01-77	146.976	0.564972	0.04679	0.02023	0.02285	0.0108	0.00354	0.00016	0.9	39	579	23	11	23	1	0	-69.5652	23	1
PE01-78	183.076	0.485437	0.09028	0.02237	0.03672	0.01085	0.00295	0.00016	0.9	1431	452	37	11	19	1	-94.7368	-7431.58	19	1
PE01-79	225.196	0.645161	0.07848	0.01556	0.04112	0.00977	0.0038	0.00017	0.9	1159	363	41	10	24	1	-70.8333	-4729.17	24	1
PE01-80	196.458	0.769231	0.02551	0.02268	0.00955	0.0089	0.00271	0.00013	0.9	-488	863	10	9	17.4	0.8	42.5287	2904.6	17.4	0.8
PE01-81	119.216	0.512821	0.03793	0.02592	0.01891	0.01376	0.00362	0.00018	0.9	-414	846	19	14	23	1	17.3913	1900	23	1
PE01-82	314.732	0.442478	0.06191	0.01101	0.02945	0.00614	0.00345	0.00012	0.9	671	343	29	6	22.2	0.8	-30.6306	-2922.52	22.2	0.8
PE01-83	54.7522	0.314465	0.05492	0.04167	0.03582	0.02954	0.00473	0.00035	0.9	409	1112	36	29	30	2	-20	-1263.33	30	2
PE01-84	151.969	0.438596	0.05342	0.02009	0.02869	0.0119	0.0039	0.00017	0.9	347	569	29	12	25	1	-16	-1288	25	1
PE01-85	104.179	0.198807	0.1585	0.05006	0.05302	0.02119	0.00243	0.00024	0.89	2440	540	52	20	16	2	-225	-15150	16	2
PE01-86	182.457	0.471698	0.03257	0.01806	0.01547	0.00914	0.00344	0.00014	0.9	-174	657	16	9	22.1	0.9	27.6018	887.33	22.1	0.9
PE01-87	47.2499	0.471698	0.07058	0.03633	0.07589	0.04381	0.0078	0.00055	0.9	945	935	74	41	50	4	-48	-1790	50	4
PE01-88	253.165	0.632911	0.07816	0.01419	0.03825	0.00827	0.00355	0.00014	0.9	1151	329	38	8	22.8	0.9	-66.6667	-4948.25	22.8	0.9
PE01-89	151.757	0.719424	0.06052	0.02512	0.02697	0.01253	0.00323	0.00018	0.9	622	680	27	12	21	1	-28.5714	-2861.9	21	1
PE01-90	206.832	0.478469	0.04788	0.01802	0.02357	0.00981	0.00357	0.00016	0.9	93	516	24	10	23	1	-4.34783	-304.348	23	1
PE01-91	101.248	0.27933	0.04858	0.06772	0.01179	0.01763	0.00176	0.0002	0.9	128	1318	12	18	11	1	-9.09091	-1063.64	11	1
PE01-92	79.3461	0.487805	0.08726	0.05607	0.02965	0.02172	0.00246	0.00025	0.9	1366	1202	30	21	16	2	-87.5	-8437.5	16	2
PE01-93	83.9852	0.293255	0.13509	0.04422	0.06683	0.0274	0.00359	0.00034	0.9	2165	586	66	26	23	2	-186.957	-9313.04	23	2
PE01-94	556.46	0.740741	0.02685	0.00624	0.01185	0.00305	0.0032	9e-05	0.9	-426	239	12	3	20.6	0.6	41.7476	2167.96	20.6	0.6
PE01-95	256.961	0.5	0.04769	0.00477	0.0557	0.00684	0.00847	0.00022	0.9	84	188	55	7	54	1	-1.85185	-55.5556	54	1
PE01-96	197.93	0.70922	0.06253	0.01695	0.02929	0.00901	0.0034	0.00014	0.9	692	499	29	9	21.9	0.9	-32.4201	-3059.82	21.9	0.9
PE01-97	402.882	0.420168	0.04133	0.00638	0.02335	0.00421	0.0041	0.00012	0.9	-214	201	23	4	26.4	0.8	12.8788	910.606	26.4	0.8
PE01-98	832.878	0.917431	0.03748	0.0029	0.02195	0.00219	0.00425	0.00011	0.9	-442	286	22	2	27.3	0.7	19.4139	1719.05	27.3	0.7
PE01-100	185.496	0.537634	0.05549	0.01655	0.02772	0.00922	0.00362	0.00014	0.9	432	484	28	9	23.3	0.9	-20.1717	-1754.08	23.3	0.9
PE01-101	444.061	0.934579	0.02838	0.00723	0.01383	0.00387	0.00353	0.0001	0.9	-356	256	14	4	22.7	0.6	38.326	1668.28	22.7	0.6
PE01-102	159.425	0.490196	0.05981	0.01928	0.03021	0.01091	0.00366	0.00016	0.9	597	566	30	11	24	1	-25	-2387.5	24	1
PE01-103	72.0397	0.198807	0.02201	0.07309	0.00696	0.02382	0.00229	0.00026	0.9	-658	1442	7	24	15	2	53.3333	4486.67	15	2
PE01-104	207.344	0.684932	0.03367	0.01451	0.01854	0.00861	0.00399	0.00015	0.9	-128	497	19	9	25.7	1	26.07	598.054	25.7	1
PE01-105	78.4419	0.510204	0.02326	0.04096	0.01203	0.02193	0.00375	0.00026	0.9	-596	1040	12	22	24	2	50	2583.33	24	2
PE01-106	188.196	0.591716	0.08366	0.02036	0.03259	0.00925	0.00283	0.00013	0.9	1285	451	33	9	18.2	0.8	-81.3187	-6960.44	18.2	0.8
PE01-107	92.2489	0.497512	0.06612	0.03484	0.03201	0.01873	0.00351	0.00023	0.9	810	935	32	18	23	1	-39.1304	-3421.74	23	1
PE01-108	120.372	0.632911	0.09286	0.02651	0.04426	0.01478	0.00346	0.00019	0.9	1485	534	44	14	22	1	-100	-6650	22	1
PE01-109	210.902	0.588235	0.08128	0.0215	0.02735	0.00842	0.00244	0.00012	0.9	1228	502	27	8	15.7	0.8	-71.9745	-7721.66	15.7	0.8
PE01-110	215.314	0.383142	0.04289	0.01592	0.02153	0.00873	0.00364	0.00014	0.9	-129	449	22	9	23.4	0.9	5.98291	651.282	23.4	0.9
PE01-111	74.6083	0.350877	0.0932	0.04811	0.04439	0.02643	0.00346	0.00031	0.9	1492	1055	44	26	22	2	-100	-6681.82	22	2
PE01-112	447.873	0.591716	0.03829	0.00757	0.01868	0.00416	0.00354	0.0001	0.9	-391	282	19	4	22.8	0.6	16.6667	1814.91	22.8	0.6
PE01-113	27.0483	0.299401	0.05012	0.13319	0.02509	0.07124	0.00363	0.00074	0.9	201	2731	25	71	23	5	-8.69565	-773.913	23	5
PE01-114	167.245	0.308642	0.03559	0.02459	0.01813	0.01336	0.0037	0.00019	0.9	-50	899	18	13	24	1	25	308.333	24	1
PE01-115	366.672	0.680272	0.02912	0.00967	0.01433	0.00515	0.00357	0.00011	0.9	-323	337	14	5	23	0.7	39.1304	1504.35	23	0.7
PE01-116	74.8585	0.520833	0.04948	0.03766	0.02933	0.02409	0.0043	0.00029	0.9	171	1030	29	24	28	2	-3.57143	-510.714	28	2
PE01-119	362.95	0.483092	0.05458	0.01699	0.02043	0.00716	0.00272	0.00012	0.9	395	495	21	7	17.5	0.8	-20	-2157.14	17.5	0.8
PE01-120	259.104	0.510204	0.03494	0.01603	0.01658	0.00821	0.00344	0.00014	0.9	-76	551	17	8	22.1	0.9	23.0769	443.891	22.1	0.9
Ages assumed < 0.5 Ma
PE01-31	365.23	0.714284
PE01-35	333.439	0.680573
PE01-39	912.983	0.966225
PE01-69	272.118	0.658689
PE01-70	234.234	0.528527
PE01-73	266.478	0.605637
PE01-99	107.021	0.202844
PE01-117	195.909	0.545742
PE01-118	131.288	0.584924

[truncated: 4 more sheets: AN-01, LW-01, CB-01, SS-01]
